# Supplementary material
Source: publisher site journal article supplement (https://zookeys.pensoft.net/article/28712/download/suppl/31/)
Supplement: Supplementary file 1

## Sheet: Checklist
Country:	Albania	Andorra	Austria	Belarus	Belgium	Bosnia and Herzegovina	Bulgaria	Croatia	Cyprus	Czech Republic	Denmark	Estonia	Finland	France	Germany	Greece	Hungary	Iceland	Ireland	Italy	Latvia	Liechtenstein	Lithuania	Luxembourg	Macedonia	Malta	Moldova	Montenegro	Netherlands	Norway	Poland	Portugal	Portugal: Azores	Portugal: Madeira Islands	Romania	Russia (European part)	Serbia	Slovakia	Slovenia	Spain	Spain: Canary Islands	Sweden	Switzerland	Turkey (European part)	Ukraine	United Kingdom
Name	AL	AD	AT	BY	BE	BA	BG	HR	CY	CZ	DK	EE	FI	FR	DE	GR	HU	IS	IE	IT	LV	LI	LT	LU	MK	MT	MD	ME	NL	NO	PL	PT	PT: AZ	PT: MA	RO	RU	RS	SK	SI	ES	ES: CA	SE	CH	TR	UA	GB	Systematic order	Family	Subfamily
Iphiclides podalirius	P	A	P	I	P	P	P	P	A	P	I	A	I	P	P	P	P	A	A	P	P	P	I	Ex	P	A	P	P	I	A	P	A	A	A	P	P	P	P	P	P	A	I	P	P	P	A	1	Papilionidae	Papilioninae
Iphiclides feisthamelii	A	P	A	A	A	A	A	A	A	A	A	A	A	P	A	A	A	A	A	A	A	A	A	A	A	A	A	A	A	A	A	P	A	A	A	A	A	A	A	P	A	A	A	A	A	A	2	Papilionidae	Papilioninae
Papilio alexanor	P	A	A	A	A	P	A	P	A	A	A	A	A	P	A	P	A	A	A	P	A	A	A	A	P	A	A	P	A	A	A	A	A	A	A	A	A	A	A	A	A	A	A	A	A	A	3	Papilionidae	Papilioninae
Papilio machaon	P	P	P	P	P	P	P	P	P	P	M	P	P	P	P	P	P	A	A	P	P	P	P	P	P	P	P	P	P	P	P	P	A	A	P	P	P	P	P	P	A	P	P	P	P	P	4	Papilionidae	Papilioninae
Papilio hospiton	A	A	A	A	A	A	A	A	A	A	A	A	A	P	A	A	A	A	A	P	A	A	A	A	A	A	A	A	A	A	A	A	A	A	A	A	A	A	A	A	A	A	A	A	A	A	5	Papilionidae	Papilioninae
Parnassius mnemosyne	P	P	P	P	A	P	P	P	A	P	Ex	P	P	P	P	P	P	A	A	P	P	A	P	A	P	A	P	P	A	P	P	A	A	A	P	P	P	P	P	P	A	P	P	P	P	A	6	Papilionidae	Parnassiinae
Parnassius phoebus	A	A	P	A	A	A	A	A	A	A	A	A	A	P	P	A	A	A	A	P	A	P	A	A	A	A	A	A	A	A	A	A	A	A	A	P	A	A	A	A	A	A	P	A	A	A	7	Papilionidae	Parnassiinae
Parnassius apollo	P	P	P	A	A	P	P	P	A	P	I	A	P	P	P	P	A	A	A	P	A	P	A	A	P	A	A	P	I	P	P	A	A	A	Ex	P	P	P	P	P	A	P	P	A	Ex	A	8	Papilionidae	Parnassiinae
Archon apollinus	A	A	A	A	A	A	A	A	A	A	A	A	A	A	A	P	A	A	A	A	A	A	A	A	A	A	A	A	A	A	A	A	A	A	A	A	A	A	A	A	A	A	A	P	A	A	9	Papilionidae	Parnassiinae
Zerynthia cerisy	P	A	A	A	A	P	P	P	P	A	A	A	A	A	A	P	A	A	A	A	A	A	A	A	P	A	A	A	A	A	A	A	A	A	P	A	P	A	A	A	A	A	A	P	A	A	10	Papilionidae	Parnassiinae
Zerynthia cretica	A	A	A	A	A	A	A	A	A	A	A	A	A	A	A	P	A	A	A	A	A	A	A	A	A	A	A	A	A	A	A	A	A	A	A	A	A	A	A	A	A	A	A	A	A	A	11	Papilionidae	Parnassiinae
Zerynthia caucasica	A	A	A	A	A	A	A	A	A	A	A	A	A	A	A	A	A	A	A	A	A	A	A	A	A	A	A	A	A	A	A	A	A	A	A	P	A	A	A	A	A	A	A	A	A	A	12	Papilionidae	Parnassiinae
Zerynthia rumina	A	P	A	A	A	A	A	A	A	A	A	A	A	P	A	A	A	A	A	A	A	A	A	A	A	A	A	A	A	A	A	P	A	A	A	A	A	A	A	P	A	A	A	A	A	A	13	Papilionidae	Parnassiinae
Zerynthia polyxena	P	A	P	P	A	P	P	P	A	P	A	A	A	P	I	P	P	A	A	P	A	A	A	A	P	A	P	P	A	A	I	A	A	A	P	P	P	P	P	A	A	A	Ex	P	P	A	14	Papilionidae	Parnassiinae
Zerynthia cassandra	A	A	A	A	A	A	A	A	A	A	A	A	A	A	A	A	A	A	A	P	A	A	A	A	A	A	A	A	A	A	A	A	A	A	A	A	A	A	A	A	A	A	A	A	A	A	15	Papilionidae	Parnassiinae
Heteropterus morpheus	P?	A	P	P	Ex	P	P	P	A	P	P	P	I	P	P	A	P	A	A	P	P	A	P	A	A	A	P	P	P	A	P	A	A	A	P	P	P	P	P	P	A	I	P	P	P	A	16	Hesperiidae	Heteropterinae
Carterocephalus silvicola	A	A	A	P	A	A	A	A	A	Ex	P	P	P	A	P	A	A	A	A	A	P	A	P	A	A	A	A	A	A	P	P	A	A	A	A	P	A	Ex	A	A	A	P	A	A	P	A	17	Hesperiidae	Heteropterinae
Carterocephalus palaemon	P	P	P	P	P	P	P	P	A	P	A	P	P	P	P	P	P	A	A	P	P	P	P	P	P	A	P	P	P	P	P	A	A	A	P	P	P	P	P	P	A	P	P	A	P	P	18	Hesperiidae	Heteropterinae
Pelopidas thrax	A	A	A	A	A	A	A	A	P	A	A	A	A	A	A	P	A	A	A	A	A	A	A	A	A	A	A	A	A	A	A	A	A	A	A	A	A	A	A	A	A	A	A	A	A	A	19	Hesperiidae	Hesperiinae
Borbo borbonica	A	A	A	A	A	A	A	A	A	A	A	A	A	A	A	A	A	A	A	A	A	A	A	A	A	A	A	A	A	A	A	A	A	A	A	A	A	A	A	P	A	A	A	A	A	A	20	Hesperiidae	Hesperiinae
Gegenes pumilio	P	A	A	A	A	P	P?	P	P	A	A	A	A	P	A	P	A	A	A	P	A	A	A	A	A	P	A	P	A	A	A	A	A	A	A	A	A	A	A	P	A	A	A	A	A	A	21	Hesperiidae	Hesperiinae
Gegenes nostrodamus	P	A	A	A	A	A	P	P	A	A	A	A	A	A	A	P	A	A	A	P	A	A	A	A	P	A	A	P	A	A	A	P	A	A	A	A	A	A	A	P	A	A	A	P	A	A	22	Hesperiidae	Hesperiinae
Ochlodes sylvanus	P	P	P	P	P	P	P	P	A	P	P	P	P	P	P	P	P	A	A	P	P	P	P	P	P	A	P	P	P	P	P	P	A	A	P	P	P	P	P	P	A	P	P	P	P	P	23	Hesperiidae	Hesperiinae
Hesperia comma	P	P	P	P	P	P	P	P	A	P	P	P	P	P	P	P	P	A	A	P	P	P	P	P	P	A	P	P	P	P	P	P	A	A	P	P	P	P	P	P	A	P	P	A	P	P	24	Hesperiidae	Hesperiinae
Thymelicus christi	A	A	A	A	A	A	A	A	A	A	A	A	A	A	A	A	A	A	A	A	A	A	A	A	A	A	A	A	A	A	A	A	A	A	A	A	A	A	A	A	P	A	A	A	A	A	25	Hesperiidae	Hesperiinae
Thymelicus acteon	P	P	P	P	P	P	P	P	P	P	A	A	A	P	P	P	P	A	A	P	A	A	A	P	P	A	A	P	Ex	A	P	P	A	A	P	P	P	P	P	P	A	A	P	P	P	P	26	Hesperiidae	Hesperiinae
Thymelicus hyrax	A	A	A	A	A	A	A	A	A	A	A	A	A	A	A	P	A	A	A	A	A	A	A	A	A	A	A	A	A	A	A	A	A	A	A	P	A	A	A	A	A	A	A	A	A	A	27	Hesperiidae	Hesperiinae
Thymelicus sylvestris	P	P	P	P	P	P	P	P	A	P	P	P	A	P	P	P	P	A	P	P	P	P	P	P	P	A	P	P	P	A	P	P	A	A	P	P	P	P	P	P	A	A	P	P	P	P	28	Hesperiidae	Hesperiinae
Thymelicus lineola	P	P	P	P	P	P	P	P	A	P	P	P	P	P	P	P	P	A	P	P	P	P	P	P	P	A	P	P	P	P	P	P	A	A	P	P	P	P	P	P	A	P	P	P	P	P	29	Hesperiidae	Hesperiinae
Spialia phlomidis	P	A	A	A	A	A	P	A	A	A	A	A	A	A	A	P	A	A	A	A	A	A	A	A	P	A	A	A	A	A	A	A	A	A	A	A	P	A	A	A	A	A	A	P	A	A	30	Hesperiidae	Pyrginae
Spialia sertorius	A	P	P	A	P	P	A	P	A	P	A	A	A	P	P	A	P	A	A	P	A	P	A	P	A	A	A	A	Ex	A	P	P	A	A	A	A	A	P	P	P	A	A	P	A	A	A	31	Hesperiidae	Pyrginae
Spialia therapne	A	A	A	A	A	A	A	A	A	A	A	A	A	P	A	A	A	A	A	P	A	A	A	A	A	A	A	A	A	A	A	A	A	A	A	A	A	A	A	A	A	A	A	A	A	A	32	Hesperiidae	Pyrginae
Spialia rosae	A	A	A	A	A	A	A	A	A	A	A	A	A	A	A	A	A	A	A	A	A	A	A	A	A	A	A	A	A	A	A	A	A	A	A	A	A	A	A	P	A	A	A	A	A	A	33	Hesperiidae	Pyrginae
Spialia orbifer	P	A	Ex	A	A	P	P	P	A	A	A	A	A	A	A	P	P	A	A	P	A	A	A	A	P	A	P	P	A	A	A	A	A	A	P	P	P	P	A	A	A	A	A	P	P	A	34	Hesperiidae	Pyrginae
Carcharodus tripolinus	A	A	A	A	A	A	A	A	A	A	A	A	A	A	A	A	A	A	A	A	A	A	A	A	A	A	A	A	A	A	A	P	A	A	A	A	A	A	A	P	A	A	A	A	A	A	35	Hesperiidae	Pyrginae
Carcharodus alceae	P	P	P	P	P	P	P	P	P	P	A	A	A	P	P	P	P	A	A	P	A	P	P	P	P	A	P	P	P	A	P	P	A	A	P	P	P	P	P	P	A	A	P	P	P	A	36	Hesperiidae	Pyrginae
Muschampia cribrellum	A	A	A	A	A	A	P	A	A	A	A	A	A	A	A	P	A	A	A	A	A	A	A	A	P	A	A	A	A	A	A	A	A	A	P	P	P	A	A	A	A	A	A	A	P	A	37	Hesperiidae	Pyrginae
Muschampia tessellum	P?	A	A	A	A	A	P	A	A	A	A	A	A	A	A	P	A	A	A	A	A	A	A	A	P	A	A	A	A	A	A	A	A	A	P	P	A	A	A	A	A	A	A	A	P	A	38	Hesperiidae	Pyrginae
Muschampia proto	P	A	A	A	A	A	A	P	A	A	A	A	A	P	A	P	A	A	A	P	A	A	A	A	P	A	A	P	A	A	A	P	A	A	A	P	A	A	A	P	A	A	A	A	P	A	39	Hesperiidae	Pyrginae
Carcharodus lavatherae	P	P	P	A	A	P	P	P	A	A	A	A	A	P	P	P	Ex	A	A	P	A	A	A	A	P	A	P	P	A	A	A	A	A	A	P	P	P	Ex	P	P	A	A	P	P	P	A	40	Hesperiidae	Pyrginae
Carcharodus orientalis	P	A	A	A	A	P	P	P	A	A	A	A	A	A	A	P	A	A	A	A	A	A	A	A	P	A	A	P	A	A	A	A	A	A	P	P	P	A	A	A	A	A	A	P	P	A	41	Hesperiidae	Pyrginae
Carcharodus floccifera	P	P	P	P	A	P	P	P	A	Ex	A	P	A	P	P	P	P	A	A	P	P	A	P	A	P	A	P	P	A	A	P	A	A	A	P	P	P	P	P	P	A	A	P	A	P	A	42	Hesperiidae	Pyrginae
Carcharodus stauderi	A	A	A	A	A	A	A	A	A	A	A	A	A	A	A	P	A	A	A	A	A	A	A	A	A	A	A	A	A	A	A	A	A	A	A	A	A	A	A	A	A	A	A	A	A	A	43	Hesperiidae	Pyrginae
Carcharodus baeticus	A	A	A	A	A	A	A	A	A	A	A	A	A	P	A	A	A	A	A	P	A	A	A	A	A	A	A	A	A	A	A	P	A	A	A	A	A	A	A	P	A	A	Ex	A	A	A	44	Hesperiidae	Pyrginae
Erynnis tages	P	P	P	P	P	P	P	P	A	P	P	P	A	P	P	P	P	A	P	P	P	P	P	P	P	A	P	P	P	P	P	P	A	A	P	P	P	P	P	P	A	P	P	P	P	P	45	Hesperiidae	Pyrginae
Erynnis marloyi	P	A	A	A	A	A	P	A	A	A	A	A	A	A	A	P	A	A	A	A	A	A	A	A	P	A	A	A	A	A	A	A	A	A	A	A	A	A	A	A	A	A	A	P	A	A	46	Hesperiidae	Pyrginae
Pyrgus malvoides	A	P	P	A	A	A	A	P	A	A	A	A	A	P	P	A	A	A	A	P	A	P	A	A	A	A	A	A	A	A	A	P	A	A	A	A	A	A	P	P	A	A	P	A	A	A	47	Hesperiidae	Pyrginae
Pyrgus malvae	P	A	P	P	P	P	P	P	A	P	P	P	P	P	P	P	P	A	A	P	P	P	P	P	P	A	P	P	P	P	P	A	A	A	P	P	P	P	P	A	A	P	P	P	P	P	48	Hesperiidae	Pyrginae
Pyrgus carthami	P	P	P	A	Ex	P	P	P	A	P	A	A	A	P	P	P	P	A	A	P	A	A	Ex	A	P	A	P	P	I	A	P	A	A	A	P	P	P	P	P	P	A	A	P	P	P	A	49	Hesperiidae	Pyrginae
Pyrgus sidae	P	A	A	A	A	P	P	P	A	A	A	A	A	P	A	P	A	A	A	P	A	A	A	A	P	A	P	P	A	A	A	A	A	A	P	P	P	A	A	P	A	A	A	P	P	A	50	Hesperiidae	Pyrginae
Pyrgus centaureae	A	A	A	A	A	A	A	A	A	A	A	A	P	A	A	A	A	A	A	A	A	A	A	A	A	A	A	A	A	P	A	A	A	A	A	P	A	A	A	A	A	P	A	A	A	A	51	Hesperiidae	Pyrginae
Pyrgus cacaliae	A	P	P	A	A	P	P	A	A	A	A	A	A	P	P	A	A	A	A	P	A	P	A	A	A	A	A	A	A	A	A	A	A	A	P	A	A	A	A	P	A	A	P	A	A	A	52	Hesperiidae	Pyrginae
Pyrgus andromedae	P	P	P	A	A	P	P	A	A	A	A	A	P	P	P	A	A	A	A	P	A	P	A	A	P	A	A	P	A	P	A	A	A	A	P	P	P	A	P	P	A	P	P	A	P	A	53	Hesperiidae	Pyrginae
Pyrgus serratulae	P	P	P	P	P	P	P	P	A	P	Ex	P	A	P	P	P	P	A	A	P	P	P	P	P	P	A	P	P	A	A	P	P	A	A	P	P	P	P	P	P	A	A	P	P	P	A	54	Hesperiidae	Pyrginae
Pyrgus armoricanus	P	A	P	A	Ex	P	P	P	A	P	P	A	A	P	P	P	P	A	A	P	A	A	A	P	P	A	P	P	I	A	P	P	A	A	P	P	P	P	P	P	A	P	P	P	P	A	55	Hesperiidae	Pyrginae
Pyrgus alveus	P	P	P	P	I	P	P	P	A	P	A	P	P	P	P	P	P	A	A	P	P	P	P	A	P	A	P	P	A	P	P	P	A	A	P	P	P	P	P	P	A	P	P	A	P	A	56	Hesperiidae	Pyrginae
Pyrgus warrenensis	A	A	P	A	A	A	A	A	A	A	A	A	A	P	P	A	A	A	A	P	A	A	A	A	A	A	A	A	A	A	A	A	A	A	A	A	A	A	P	A	A	A	P	A	A	A	57	Hesperiidae	Pyrginae
Pyrgus foulquieri	A	A	A	A	A	A	A	A	A	A	A	A	A	P	A	A	A	A	A	P	A	A	A	A	A	A	A	A	A	A	A	A	A	A	A	A	A	A	A	P	A	A	A	A	A	A	58	Hesperiidae	Pyrginae
Pyrgus onopordi	A	A	A	A	A	A	A	A	A	A	A	A	A	P	Ex	A	A	A	A	P	A	A	A	A	A	A	A	A	A	A	A	P	A	A	A	A	A	A	Ex	P	A	A	P	A	A	A	59	Hesperiidae	Pyrginae
Pyrgus carlinae	A	A	P	A	A	A	A	A	A	A	A	A	A	P	A	A	A	A	A	P	A	A	A	A	A	A	A	A	A	A	A	A	A	A	A	A	A	A	A	A	A	A	P	A	A	A	60	Hesperiidae	Pyrginae
Pyrgus cirsii	A	P	Ex	A	A	A	A	A	A	A	A	A	A	P	P	A	A	A	A	A	A	A	A	A	A	A	A	A	I	A	A	A	A	A	A	A	A	A	A	P	A	A	P	A	A	A	61	Hesperiidae	Pyrginae
Pyrgus cinarae	P	A	A	A	A	A	P	A	A	A	A	A	A	A	A	P	A	A	A	A	A	A	A	A	P	A	A	A	A	A	A	A	A	A	A	P	P	A	A	P	A	A	A	P	P	A	62	Hesperiidae	Pyrginae
Leptidea duponcheli	P	A	A	A	A	A	P	A	A	A	A	A	A	P	A	P	A	A	A	A	A	A	A	A	P	A	A	P?	A	A	A	A	A	A	A	P	P	A	A	A	A	A	A	P	P	A	63	Pieridae	Dismorphiinae
Leptidea morsei	A	A	P	A	A	P	A	P	A	Ex	A	A	A	A	A	A	P	A	A	A	A	A	A	A	A	A	P	A	A	A	P	A	A	A	P	P	Ex	P	P	A	A	A	A	A	P	A	64	Pieridae	Dismorphiinae
Leptidea juvernica	P	A	P	P	P	P	P	P	A	P	Ex	P	P	P	P	P	P	A	P	P	P	P	P	P	A	A	P?	P	I	P	P	A	A	A	P	P	P	P	P	A	A	P	P	A	P	P	65	Pieridae	Dismorphiinae
Leptidea sinapis	P	P	P	P	P	P	P	P	A	P	Ex	P	P	P	P	P	P	A	P	P	P	P	P	P	P	A	P	P	P	P	P	P	A	A	P	P	P	P	P	P	A	P	P	P	P	P	66	Pieridae	Dismorphiinae
Leptidea reali	A	P	A	A	A	A	A	A	A	A	A	A	A	P	A	A	A	A	A	P	A	A	A	A	A	A	A	A	A	A	A	A	A	A	A	A	A	A	A	P	A	A	A	A	A	A	67	Pieridae	Dismorphiinae
Gonepteryx rhamni	P	P	P	P	P	P	P	P	A	P	P	P	P	P	P	P	P	A	P	P	P	P	P	P	P	A	P	P	P	P	P	P	A	A	P	P	P	P	P	P	A	P	P	P	P	P	68	Pieridae	Coliadinae
Gonepteryx cleobule	A	A	A	A	A	A	A	A	A	A	A	A	A	A	A	A	A	A	A	A	A	A	A	A	A	A	A	A	A	A	A	A	A	A	A	A	A	A	A	A	P	A	A	A	A	A	69	Pieridae	Coliadinae
Gonepteryx cleopatra	P	P	A	A	A	P	P	P	P	A	A	A	A	P	A	P	A	A	A	P	A	A	A	A	I	P	A	P	A	A	A	P	A	A	A	A	A	A	I	P	A	A	I	P	A	A	70	Pieridae	Coliadinae
Gonepteryx maderensis	A	A	A	A	A	A	A	A	A	A	A	A	A	A	A	A	A	A	A	A	A	A	A	A	A	A	A	A	A	A	A	A	A	P	A	A	A	A	A	A	A	A	A	A	A	A	71	Pieridae	Coliadinae
Gonepteryx farinosa	P	A	A	A	A	A	P	A	A	A	A	A	A	A	A	P	A	A	A	A	A	A	A	A	P	A	A	P?	A	A	A	A	A	A	A	A	A	A	A	A	A	A	A	P	A	A	72	Pieridae	Coliadinae
Catopsilia florella	A	A	A	A	A	A	A	A	I	A	A	A	A	A	A	A	A	A	A	A	A	A	A	A	A	A	A	A	A	A	A	A	A	I	A	A	A	A	A	A	P	A	A	A	A	A	73	Pieridae	Coliadinae
Colias hyale	P?	A	P	P	M	P	P	P	A	P	M	P	M	P	P	A	P	A	A	P	P	P	P	M	P	A	P	P	M	A	P	A	A	A	P	P	P	P	P	A	A	I	P	A	P	I	74	Pieridae	Coliadinae
Colias alfacariensis	P	P	P	I	P	P	P	P	A	P	A	A	A	P	P	P	P	A	A	P	A	P	I	P?	P	A	P	P	I	A	P	P	A	A	P	P	P	P	P	P	A	A	P	A	P	I	75	Pieridae	Coliadinae
Colias phicomone	A	P	P	A	A	A	A	A	A	A	A	A	A	P	P	A	A	A	A	P	A	P	A	A	A	A	A	A	A	A	A	A	A	A	A	A	A	A	A	P	A	A	P	A	A	A	76	Pieridae	Coliadinae
Colias aurorina	P	A	A	A	A	A	A	A	A	A	A	A	A	A	A	P	A	A	A	A	A	A	A	A	A	A	A	A	A	A	A	A	A	A	A	A	A	A	A	A	A	A	A	A	A	A	77	Pieridae	Coliadinae
Colias chrysotheme	A	A	P	A	A	A	A	A	A	Ex	A	A	A	A	A	A	P	A	A	A	A	A	A	A	A	A	P	A	I	A	A	A	A	A	P	P	A	P	A	A	A	A	A	A	P	A	78	Pieridae	Coliadinae
Colias erate	A	A	P	A	A	A	P	P	A	P	A	A	A	A	I	P	P	A	A	A	A	A	A	A	P	A	P	A	A	A	I	A	A	A	P	P	P	P	I	A	A	A	A	P	P	A	79	Pieridae	Coliadinae
Colias crocea	P	M	P	I	M	M	P	P	P	M	M	I	I	P	M	M	M	A	M	P	M	M	I	M	M	P	P	P	M	I	M	P	P	P	P	P	P	M	P	P	P	I	M	P	P	M	80	Pieridae	Coliadinae
Colias myrmidone	A	A	P	P	A	A	A	P	A	Ex	A	A	A	A	Ex	A	Ex	A	A	A	P	A	I	A	A	A	A	A	A	A	P	A	A	A	P	P	P	P	Ex	A	A	A	A	A	P	A	81	Pieridae	Coliadinae
Colias caucasica	P	A	A	A	A	P	P	P	A	A	A	A	A	A	A	P	A	A	A	A	A	A	A	A	P	A	A	P	A	A	A	A	A	A	A	A	P	A	A	A	A	A	A	A	A	A	82	Pieridae	Coliadinae
Colias palaeno	A	A	P	P	Ex	A	A	A	A	P	I	P	P	P	P	A	A	A	A	P	P	P	P	A	A	A	A	A	I	P	P	A	A	A	Ex	P	A	P	A	A	A	P	P	A	P	A	83	Pieridae	Coliadinae
Colias tyche	A	A	A	A	A	A	A	A	A	A	A	A	P	A	A	A	A	A	A	A	A	A	A	A	A	A	A	A	A	P	A	A	A	A	A	P	A	A	A	A	A	P	A	A	A	A	84	Pieridae	Coliadinae
Colias hecla	A	A	A	A	A	A	A	A	A	A	A	A	P	A	A	A	A	A	A	A	A	A	A	A	A	A	A	A	A	P	A	A	A	A	A	P	A	A	A	A	A	P	A	A	A	A	85	Pieridae	Coliadinae
Colotis evagore	A	A	A	A	A	A	A	A	A	A	A	A	A	A	A	A	A	A	A	A	A	A	A	A	A	A	A	A	A	A	A	A	A	A	A	A	A	A	A	P	A	A	A	A	A	A	86	Pieridae	Pierinae
Aporia crataegi	P	P	P	P	P	P	P	P	P	P	P	P	P	P	P	P	P	A	A	P	P	I	P	P	P	A	P	P	Ex	P	P	P	A	A	P	P	P	P	P	P	A	P	P	P	P	Ex	87	Pieridae	Pierinae
Pontia chloridice	P	A	A	A	A	A	P	A	P	A	A	A	I	A	A	P	A	A	A	A	I	A	A	A	P	A	A	A	A	A	A	A	A	A	A	P	A	A	A	A	A	A	A	P	I	A	88	Pieridae	Pierinae
Pontia callidice	A	P	P	A	A	A	A	A	A	A	A	A	A	P	P	A	A	A	A	P	A	P	A	A	A	A	A	A	A	A	A	A	A	A	A	P	A	A	A	P	A	A	P	A	A	A	89	Pieridae	Pierinae
Pontia edusa	P	A	P	P	I	P	P	P	A	P	M	I	M	A	P	P	P	A	A	P	P	A	P	I	P	M	P	P	I	I	P	A	A	A	P	P	P	P	P	A	A	P	P	P	P	A	90	Pieridae	Pierinae
Pontia daplidice	A	M	A	A	A	A	A	A	P	A	A	A	A	P	A	A	A	A	A	P	A	A	A	A	A	A	A	A	I	A	A	P	A	A	A	A	A	A	A	P	P	A	A	A	A	I	91	Pieridae	Pierinae
Pieris krueperi	P	A	A	A	A	A	P	A	A	A	A	A	A	A	A	P	A	A	A	A	A	A	A	A	P	A	A	A	A	A	A	A	A	A	A	A	A	A	A	A	A	A	A	A	A	A	92	Pieridae	Pierinae
Pieris brassicae	P	P	P	P	P	P	P	P	P	P	P	P	P	P	P	P	P	I	P	P	P	P	P	P	P	P	P	P	P	P	P	P	P	A	P	P	P	P	P	P	I	P	P	P	P	P	93	Pieridae	Pierinae
Pieris wollastoni	A	A	A	A	A	A	A	A	A	A	A	A	A	A	A	A	A	A	A	A	A	A	A	A	A	A	A	A	A	A	A	A	A	Ex	A	A	A	A	A	A	A	A	A	A	A	A	94	Pieridae	Pierinae
Pieris cheiranthi	A	A	A	A	A	A	A	A	A	A	A	A	A	A	A	A	A	A	A	A	A	A	A	A	A	A	A	A	A	A	A	A	A	A	A	A	A	A	A	A	P	A	A	A	A	A	95	Pieridae	Pierinae
Pieris rapae	P	M	P	P	P	P	P	P	P	P	P	P	P	P	P	P	P	I	P	P	P	P	P	P	P	P	P	P	P	P	P	P	A	P	P	P	P	P	P	P	P	P	P	P	P	P	96	Pieridae	Pierinae
Pieris mannii	P	P	P	A	P	P	P	P	A	I	A	A	A	P	P	P	Ex	A	A	P	A	P	A	P	P	A	A	P	P	A	A	A	A	A	P	A	P	Ex	P	P	A	A	P	P	A	A	97	Pieridae	Pierinae
Pieris ergane	P	A	A	A	A	P	P	P	A	A	A	A	A	P	A	P	P	A	A	P	A	A	A	A	P	A	A	P	A	A	A	A	A	A	P	A	P	A	P	P	A	A	A	A	A	A	98	Pieridae	Pierinae
Pieris bryoniae	A	A	P	A	A	A	A	A	A	P	A	A	A	P	P	A	P	A	A	P	A	P	A	A	A	A	A	A	A	A	P	A	A	A	P	P	A	P	P	A	A	A	P	A	P	A	99	Pieridae	Pierinae
Pieris napi	P	P	P	P	P	P	P	P	A	P	P	P	P	P	P	P	P	A	P	P	P	P	P	P	P	A	P	P	P	P	P	P	A	A	P	P	P	P	P	P	A	P	P	P	P	P	100	Pieridae	Pierinae
Pieris balcana	P	A	A	A	A	P	P	P	A	A	A	A	A	A	A	P	A	A	A	A	A	A	A	A	P	A	A	P	A	A	A	A	A	A	P?	A	P	A	P	A	A	A	A	A	A	A	101	Pieridae	Pierinae
Euchloe tagis	A	A	A	A	A	A	A	A	A	A	A	A	A	P	A	A	A	A	A	P	A	A	A	A	A	A	A	A	A	A	A	P	A	A	A	A	A	A	A	P	A	A	A	A	A	A	102	Pieridae	Pierinae
Euchloe eversi	A	A	A	A	A	A	A	A	A	A	A	A	A	A	A	A	A	A	A	A	A	A	A	A	A	A	A	A	A	A	A	A	A	A	A	A	A	A	A	A	P	A	A	A	A	A	103	Pieridae	Pierinae
Euchloe grancanariensis	A	A	A	A	A	A	A	A	A	A	A	A	A	A	A	A	A	A	A	A	A	A	A	A	A	A	A	A	A	A	A	A	A	A	A	A	A	A	A	A	P	A	A	A	A	A	104	Pieridae	Pierinae
Euchloe hesperidum	A	A	A	A	A	A	A	A	A	A	A	A	A	A	A	A	A	A	A	A	A	A	A	A	A	A	A	A	A	A	A	A	A	A	A	A	A	A	A	A	P	A	A	A	A	A	105	Pieridae	Pierinae
Euchloe belemia	A	A	A	A	A	A	A	A	A	A	A	A	A	A	A	A	A	A	A	A	A	A	A	A	A	I	A	A	A	A	A	P	A	A	A	A	A	A	A	P	A	A	A	A	A	A	106	Pieridae	Pierinae
Euchloe insularis	A	A	A	A	A	A	A	A	A	A	A	A	A	P	A	A	A	A	A	P	A	A	A	A	A	A	A	A	A	A	A	A	A	A	A	A	A	A	A	A	A	A	A	A	A	A	107	Pieridae	Pierinae
Euchloe crameri	A	P	A	A	A	A	A	A	A	A	A	A	A	P	A	A	A	A	A	P	A	A	A	A	A	A	A	A	A	A	A	P	A	A	A	A	A	A	A	P	A	A	A	A	A	A	108	Pieridae	Pierinae
Euchloe simplonia	A	P	A	A	A	A	A	A	A	A	A	A	A	P	A	A	A	A	A	P	A	A	A	A	A	A	A	A	A	A	A	A	A	A	A	A	A	A	A	P	A	A	P	A	A	A	109	Pieridae	Pierinae
Euchloe ausonia	P	A	A	A	A	P	P	P	P	A	A	A	I	A	A	P	A	A	A	P	A	A	A	A	P	A	P	P	A	A	A	A	A	A	P	P	P	A	A	A	A	A	A	P	P	A	110	Pieridae	Pierinae
Euchloe charlonia	A	A	A	A	A	A	A	A	A	A	A	A	A	A	A	A	A	A	A	A	A	A	A	A	A	A	A	A	A	A	A	A	A	A	A	A	A	A	A	A	P	A	A	A	A	A	111	Pieridae	Pierinae
Euchloe penia	P	A	A	A	A	A	P	A	A	A	A	A	A	A	A	P	A	A	A	A	A	A	A	A	P	A	A	A	A	A	A	A	A	A	A	A	A	A	A	A	A	A	A	P	A	A	112	Pieridae	Pierinae
Euchloe bazae	A	A	A	A	A	A	A	A	A	A	A	A	A	A	A	A	A	A	A	A	A	A	A	A	A	A	A	A	A	A	A	A	A	A	A	A	A	A	A	P	A	A	A	A	A	A	113	Pieridae	Pierinae
Zegris pyrothoe	A	A	A	A	A	A	A	A	A	A	A	A	A	A	A	A	A	A	A	A	A	A	A	A	A	A	A	A	A	A	A	A	A	A	A	P	A	A	A	A	A	A	A	A	A	A	114	Pieridae	Pierinae
Zegris eupheme	A	A	A	A	A	A	A	A	A	A	A	A	A	A	A	A	A	A	A	A	A	A	A	A	A	A	A	A	A	A	A	A	A	A	A	P	A	A	A	P	A	A	A	A	P	A	115	Pieridae	Pierinae
Anthocharis euphenoides	A	P	A	A	A	A	A	A	A	A	A	A	A	P	A	A	A	A	A	P	A	A	A	A	A	A	A	A	A	A	A	P	A	A	A	A	A	A	A	P	A	A	I	A	A	A	116	Pieridae	Pierinae
Anthocharis cardamines	P	P	P	P	P	P	P	P	P	P	P	P	P	P	P	P	P	A	P	P	P	P	P	P	P	A	P	P	P	P	P	P	A	A	P	P	P	P	P	P	A	P	P	P	P	P	117	Pieridae	Pierinae
Anthocharis gruneri	P	A	A	A	A	A	P	A	A	A	A	A	A	A	A	P	A	A	A	A	A	A	A	A	P	A	A	A	A	A	A	A	A	A	A	A	P	A	A	A	A	A	A	A	A	A	118	Pieridae	Pierinae
Anthocharis damone	P	A	A	A	A	A	A	A	A	A	A	A	A	A	A	P	A	A	A	P	A	A	A	A	P	A	A	A	A	A	A	A	A	A	A	A	P	A	A	A	A	A	A	P	A	A	119	Pieridae	Pierinae
Hamearis lucina	P	P	P	Ex	P	P	P	P	A	P	Ex	P	A	P	P	P	P	A	A	P	P	P	Ex	Ex	P	A	P	P	A	A	P	P	A	A	P	P	P	P	P	P	A	P	P	P	P	P	120	Riodinidae	Nemeobiinae
Lycaena dimorpha	A	A	A	A	A	A	A	A	A	A	A	A	A	A	A	A	A	A	A	A	A	A	A	A	A	A	A	A	A	A	A	A	A	A	A	P	A	A	A	A	A	A	A	A	A	A	121	Lycaenidae	Lycaeninae
Lycaena helle	A	P	P	P	P	A	P	A	A	P	A	A	P	P	P	A	A	A	A	Ex	A	A	P	P	A	A	A	A	A	P	P	A	A	A	P	P	P	Ex	A	P	A	P	P	A	P	A	122	Lycaenidae	Lycaeninae
Lycaena alciphron	P	P	P	P	A	P	P	P	A	P	I	P	A	P	P	P	P	A	A	P	P	A	P	A	P	A	P	P	A	A	P	P	A	A	P	P	P	P	P	P	A	A	P	P	P	A	123	Lycaenidae	Lycaeninae
Lycaena thetis	A	A	A	A	A	A	A	A	A	A	A	A	A	A	A	P	A	A	A	A	A	A	A	A	A	A	A	A	A	A	A	A	A	A	A	A	A	A	A	A	A	A	A	A	A	A	124	Lycaenidae	Lycaeninae
Lycaena thersamon	P	A	Ex	A	A	P	P	P	P	Ex	A	A	A	A	A	P	P	A	A	P	A	A	A	A	P	A	P	P	A	A	A	A	A	A	P	P	P	P	A	A	A	A	A	P	P	A	125	Lycaenidae	Lycaeninae
Lycaena dispar	P	A	P	P	P	P	P	P	A	P	Ex	P	P	P	P	P	P	A	A	P	P	A	P	P	P	A	P	P	P	A	P	A	A	A	P	P	P	P	P	A	A	A	P	P	P	Ex	126	Lycaenidae	Lycaeninae
Lycaena hippothoe	A	P	P	P	P	P	A	P	A	P	P	P	P	P	P	A	P	A	A	P	P	P	P	P	A	A	A	A	Ex	P	P	A	A	A	P	P	P	P	P	P	A	P	P	A	P	A	127	Lycaenidae	Lycaeninae
Lycaena candens	P	A	A	A	A	P	P	P	A	A	A	A	A	A	A	P	A	A	A	A	A	A	A	A	P	A	A	P	A	A	A	A	A	A	A	A	P	A	A	A	A	A	A	A	A	A	128	Lycaenidae	Lycaeninae
Lycaena ottomana	P	A	A	A	A	P	P	P	A	A	A	A	A	A	A	P	A	A	A	A	A	A	A	A	A	A	A	P	A	A	A	A	A	A	A	A	A	A	A	A	A	A	A	A	A	A	129	Lycaenidae	Lycaeninae
Lycaena bleusei	A	A	A	A	A	A	A	A	A	A	A	A	A	A	A	A	A	A	A	A	A	A	A	A	A	A	A	A	A	A	A	P	A	A	A	A	A	A	A	P	A	A	A	A	A	A	130	Lycaenidae	Lycaeninae
Lycaena phlaeas	P	P	P	P	P	P	P	P	P	P	P	P	P	P	P	P	P	A	P	P	P	A	P	P	P	P	P	P	P	P	P	P	A	P	P	P	P	P	P	P	P	P	P	P	P	P	131	Lycaenidae	Lycaeninae
Lycaena virgaureae	P	P	P	P	P	P	P	P	A	P	P	P	P	P	P	P	P	A	A	P	P	A	P	Ex	P	A	P	P	I	P	P	P	A	A	P	P	P	P	P	P	A	P	P	A	P	A	132	Lycaenidae	Lycaeninae
Lycaena tityrus	P	P	P	P	P	P	P	P	A	P	P	P	I	P	P	P	P	A	A	P	P	P	P	P	P	A	P	P	P	A	P	P	A	A	P	P	P	P	P	P	A	A	P	P	P	A	133	Lycaenidae	Lycaeninae
Cigaritis acamas	A	A	A	A	A	A	A	A	P	A	A	A	A	A	A	A	A	A	A	A	A	A	A	A	A	A	A	A	A	A	A	A	A	A	A	A	A	A	A	A	A	A	A	A	A	A	134	Lycaenidae	Aphnaeinae
Thecla betulae	P	P	P	P	P	P	P	P	A	P	P	P	P	P	P	P	P	A	P	P	P	P	P	P	P	A	P	P	P	P	P	P	A	A	P	P	P	P	P	P	A	P	P	P	P	P	135	Lycaenidae	Theclinae
Favonius quercus	P	P	P	P	P	P	P	P	P	P	P	P	P	P	P	P	P	A	P	P	P	P	P	P	P	A	P	P	P	P	P	P	A	A	P	P	P	P	P	P	A	P	P	P	P	P	136	Lycaenidae	Theclinae
Laeosopis roboris	A	P	A	A	A	A	A	A	A	A	A	A	A	P	A	A	A	A	A	A	A	A	A	A	A	A	A	A	A	A	A	P	A	A	A	A	A	A	A	P	A	A	A	A	A	A	137	Lycaenidae	Theclinae
Tomares ballus	A	A	A	A	A	A	A	A	A	A	A	A	A	P	A	A	A	A	A	A	A	A	A	A	A	A	A	A	A	A	A	P	A	A	A	A	A	A	A	P	A	A	A	A	A	A	138	Lycaenidae	Theclinae
Tomares nogelii	A	A	A	A	A	A	A	A	A	A	A	A	A	A	A	A	A	A	A	A	A	A	A	A	A	A	P	A	A	A	A	A	A	A	P	A	A	A	A	A	A	A	A	A	P	A	139	Lycaenidae	Theclinae
Tomares callimachus	A	A	A	A	A	A	A	A	A	A	A	A	A	A	A	A	A	A	A	A	A	A	A	A	A	A	A	A	A	A	A	A	A	A	A	P	A	A	A	A	A	A	A	A	P	A	140	Lycaenidae	Theclinae
Callophrys avis	A	A	A	A	A	A	A	A	A	A	A	A	A	P	A	A	A	A	A	P	A	A	A	A	A	A	A	A	A	A	A	P	A	A	A	A	A	A	A	P	A	A	A	A	A	A	141	Lycaenidae	Theclinae
Callophrys suaveola	A	A	A	A	A	A	A	A	A	A	A	A	A	A	A	A	A	A	A	A	A	A	A	A	A	A	A	A	A	A	A	A	A	A	A	P	A	A	A	A	A	A	A	A	A	A	142	Lycaenidae	Theclinae
Callophrys rubi	P	P	P	P	P	P	P	P	A	P	P	P	P	P	P	P	P	A	P	P	P	P	P	P	P	I	P	P	P	P	P	P	A	A	P	P	P	P	P	P	A	P	P	P	P	P	143	Lycaenidae	Theclinae
Callophrys chalybeitincta	A	A	A	A	A	A	A	A	A	A	A	A	A	A	A	A	A	A	A	A	A	A	A	A	A	A	A	A	A	A	A	A	A	A	A	P	A	A	A	A	A	A	A	A	A	A	144	Lycaenidae	Theclinae
Neolycaena rhymnus	A	A	A	A	A	A	A	A	A	A	A	A	A	A	A	A	A	A	A	A	A	A	A	A	A	A	A	A	A	A	A	A	A	A	A	P	A	A	A	A	A	A	A	A	P	A	145	Lycaenidae	Theclinae
Satyrium pruni	P?	A	P	P	P	P	P	P	A	P	Ex	P	P	P	P	P	P	A	A	P	P	A	P	P	P	A	P	P	I	A	P	A	A	A	P	P	P	P	P	P	A	P	P	A	P	P	146	Lycaenidae	Theclinae
Satyrium ilicis	P	P	P	P	P	P	P	P	A	P	Ex	P	A	P	P	P	P	A	A	P	P	A	P	P	P	A	P	P	P	A	P	P	A	A	P	P	P	P	P	P	A	P	P	P	P	A	147	Lycaenidae	Theclinae
Satyrium esculi	A	P	A	A	A	A	A	A	A	A	A	A	A	P	A	A	A	A	A	P	A	A	A	A	A	A	A	A	A	A	A	P	A	A	A	A	A	A	A	P	A	A	A	A	A	A	148	Lycaenidae	Theclinae
Satyrium ledereri	A	A	A	A	A	A	A	A	A	A	A	A	A	A	A	P	A	A	A	A	A	A	A	A	A	A	A	A	A	A	A	A	A	A	A	A	A	A	A	A	A	A	A	A	A	A	149	Lycaenidae	Theclinae
Satyrium w-album	P	P	P	P	P	P	P	P	A	P	P	P	P	P	P	P	P	A	A	P	P	P	P	P	P	A	P	P	P	P	P	A	A	A	P	P	P	P	P	P	A	P	P	A	P	P	150	Lycaenidae	Theclinae
Satyrium spini	P	P	P	P	P	P	P	P	A	P	A	A	A	P	P	P	P	A	A	P	A	A	P	I	P	A	P	P	A	A	P	P	A	A	P	P	P	P	P	P	A	A	P	P	P	A	151	Lycaenidae	Theclinae
Satyrium acaciae	P	P	P	A	Ex	P	P	P	A	P	A	A	A	P	P	P	P	A	A	P	A	A	A	I	P	A	P	P	A	A	P	A	A	A	P	P	P	P	P	P	A	A	P	P	P	A	152	Lycaenidae	Theclinae
Leptotes pirithous	P	M	I	A	A	P	P	P	P	I	A	A	A	P	I	P	I	A	A	P	A	I	A	A	M	P	P	M	A	A	I	P	A	P	I	P	M	I	P	P	P	A	I	P	I	A	153	Lycaenidae	Polyommatinae
Cyclyrius webbianus	A	A	A	A	A	A	A	A	A	A	A	A	A	A	A	A	A	A	A	A	A	A	A	A	A	A	A	A	A	A	A	A	A	A	A	A	A	A	A	A	P	A	A	A	A	A	154	Lycaenidae	Polyommatinae
Azanus ubaldus	A	A	A	A	A	A	A	A	A	A	A	A	A	A	A	A	A	A	A	P	A	A	A	A	A	P	A	A	A	A	A	A	A	A	A	A	A	A	A	A	P	A	A	A	A	A	155	Lycaenidae	Polyommatinae
Azanus jesous	A	A	A	A	A	A	A	A	I	A	A	A	A	A	A	A	A	A	A	A	A	A	A	A	A	A	A	A	A	A	A	A	A	A	A	A	A	A	A	P	A	A	A	A	A	A	156	Lycaenidae	Polyommatinae
Lampides boeticus	P	M	I	A	I	P	M	P	P	I	A	A	A	P	I	P	I	A	A	P	A	A	A	I	M	P	P	M	I	A	I	P	P	P	I	P	M	I	P	P	P	A	M	P	I	I	157	Lycaenidae	Polyommatinae
Cacyreus marshalli	P	P	I	A	A	P	P	P	A	I	I	A	A	P	I	P	A	A	A	P	A	A	A	A	P?	P	A	P	I	A	A	P	A	A	A	A	A	A	P	P	P	A	P	A	A	I	158	Lycaenidae	Polyommatinae
Celastrina argiolus	P	P	P	P	P	P	P	P	P	P	P	P	P	P	P	P	P	A	P	P	P	P	P	P	P	P	P	P	P	P	P	P	A	A	P	P	P	P	P	P	A	P	P	P	P	P	159	Lycaenidae	Polyommatinae
Tarucus theophrastus	A	A	A	A	A	A	A	A	A	A	A	A	A	A	A	A	A	A	A	A	A	A	A	A	A	A	A	A	A	A	A	A	A	A	A	A	A	A	A	P	A	A	A	A	A	A	160	Lycaenidae	Polyommatinae
Tarucus balkanicus	P	A	A	A	A	P	P	P	P	A	A	A	A	A	A	P	A	A	A	A	A	A	A	A	P	A	A	P	A	A	A	A	A	A	A	A	A	A	A	A	A	A	A	P	A	A	161	Lycaenidae	Polyommatinae
Phengaris alcon	P	P	P	P	P	P	P	P	A	P	P	P	A	P	P	P	P	A	A	P	P	P	P	A	P	A	A	P	P	A	P	P	A	A	P	P	P	P	P	P	A	P	P	A	P	A	162	Lycaenidae	Polyommatinae
Phengaris arion	P	P	P	P	P	P	P	P	A	P	P	P	P	P	P	P	P	A	A	P	P	P	P	P	P	A	P	P	Ex	A	P	A	A	A	P	P	P	P	P	P	A	P	P	P	P	P	163	Lycaenidae	Polyommatinae
Phengaris teleius	A	A	P	P	Ex	A	A	P	A	P	A	A	A	P	P	A	P	A	A	P	P	P	P	A	A	A	A	A	P	A	P	A	A	A	P	P	P	P	P	A	A	A	P	A	P	A	164	Lycaenidae	Polyommatinae
Phengaris nausithous	A	A	P	P	A	A	P	P	A	P	A	A	A	P	P	A	P	A	A	A	A	P	A	A	A	A	A	A	P	A	P	A	A	A	P	P	A	P	P	P	A	A	P	A	P	A	165	Lycaenidae	Polyommatinae
Turanana taygetica	A	A	A	A	A	A	A	A	A	A	A	A	A	A	A	P	A	A	A	A	A	A	A	A	A	A	A	A	A	A	A	A	A	A	A	A	A	A	A	A	A	A	A	A	A	A	166	Lycaenidae	Polyommatinae
Pseudophilotes bavius	A	A	A	A	A	A	P	A	A	A	A	A	A	A	A	P	A	A	A	A	A	A	A	A	P	A	A	A	A	A	A	A	A	A	P	P	P	A	A	A	A	A	A	P	P	A	167	Lycaenidae	Polyommatinae
Pseudophilotes barbagiae	A	A	A	A	A	A	A	A	A	A	A	A	A	A	A	A	A	A	A	P	A	A	A	A	A	A	A	A	A	A	A	A	A	A	A	A	A	A	A	A	A	A	A	A	A	A	168	Lycaenidae	Polyommatinae
Pseudophilotes abencerragus	A	A	A	A	A	A	A	A	A	A	A	A	A	A	A	A	A	A	A	A	A	A	A	A	A	A	A	A	A	A	A	P	A	A	A	A	A	A	A	P	A	A	A	A	A	A	169	Lycaenidae	Polyommatinae
Pseudophilotes panoptes	A	A	A	A	A	A	A	A	A	A	A	A	A	A	A	A	A	A	A	A	A	A	A	A	A	A	A	A	A	A	A	P	A	A	A	A	A	A	A	P	A	A	A	A	A	A	170	Lycaenidae	Polyommatinae
Pseudophilotes vicrama	P	A	P	P	A	P	P	P	P	P	A	P	P	A	P	P	P	A	A	P	P	A	P	A	P	A	P	P	A	A	P	A	A	A	P	P	P	P	P	A	A	A	A	P	P	A	171	Lycaenidae	Polyommatinae
Pseudophilotes baton	A	P	P	A	Ex	A	A	A	A	P	A	A	A	P	P	A	A	A	A	P	A	A	A	A	A	A	A	A	A	A	Ex	P	A	A	A	A	A	A	A	P	A	A	P	A	A	A	172	Lycaenidae	Polyommatinae
Scolitantides orion	P	A	P	P	A	P	P	P	A	P	A	A	P	P	P	P	P	A	A	P	A	A	A	A	P	A	P	P	A	P	P	A	A	A	P	P	P	P	P	P	A	P	P	P	P	A	173	Lycaenidae	Polyommatinae
Praephilotes anthracias	A	A	A	A	A	A	A	A	A	A	A	A	A	A	A	A	A	A	A	A	A	A	A	A	A	A	A	A	A	A	A	A	A	A	A	P	A	A	A	A	A	A	A	A	A	A	174	Lycaenidae	Polyommatinae
Iolana iolas	P	A	A	A	A	P	P	P	A	A	A	A	A	P	A	P	P	A	A	P	A	A	A	A	P	A	A	P	A	A	A	A	A	A	P	A	P	Ex	P	A	A	A	P	A	A	A	175	Lycaenidae	Polyommatinae
Iolana debilitata	A	A	A	A	A	A	A	A	A	A	A	A	A	A	A	A	A	A	A	A	A	A	A	A	A	A	A	A	A	A	A	A	A	A	A	A	A	A	A	P	A	A	A	A	A	A	176	Lycaenidae	Polyommatinae
Glaucopsyche melanops	A	A	A	A	A	A	A	A	A	A	A	A	A	P	A	A	A	A	A	P	A	A	A	A	A	A	A	A	A	A	A	P	A	A	A	A	A	A	A	P	A	A	A	A	A	A	177	Lycaenidae	Polyommatinae
Glaucopsyche paphos	A	A	A	A	A	A	A	A	P	A	A	A	A	A	A	A	A	A	A	A	A	A	A	A	A	A	A	A	A	A	A	A	A	A	A	A	A	A	A	A	A	A	A	A	A	A	178	Lycaenidae	Polyommatinae
Glaucopsyche alexis	P	P	P	P	P	P	P	P	A	P	I	Ex	P	P	P	P	P	A	A	P	P	P	P	P	P	A	P	P	A	P	P	P	A	A	P	P	P	P	P	P	A	P	P	P	P	A	179	Lycaenidae	Polyommatinae
Zizeeria knysna	A	A	A	A	A	A	A	A	A	A	A	A	A	A	A	A	A	A	A	A	A	A	A	A	A	A	A	A	A	A	A	P	A	A	A	A	A	A	A	P	P	A	A	A	A	A	180	Lycaenidae	Polyommatinae
Zizeeria karsandra	A	A	A	A	A	A	A	A	P	A	A	A	A	A	A	P	A	A	A	P	A	A	A	A	A	P	A	A	A	A	A	A	A	A	A	A	A	A	A	A	A	A	A	A	A	A	181	Lycaenidae	Polyommatinae
Tongeia fischeri	A	A	A	A	A	A	A	A	A	A	A	A	A	A	A	A	A	A	A	A	A	A	A	A	A	A	A	A	A	A	A	A	A	A	A	P	A	A	A	A	A	A	A	A	A	A	182	Lycaenidae	Polyommatinae
Cupido argiades	P	P	P	P	Ex	P	P	P	A	P	A	P	P	P	P	P	P	A	A	P	P	M	P	P	M	A	P	P	P	A	P	A	A	A	P	P	P	P	P	P	A	I	P	P	P	I	183	Lycaenidae	Polyommatinae
Cupido decoloratus	P	A	P	P	A	P	P	P	A	P	A	A	A	A	A	P	P	A	A	A	A	A	A	A	P	A	P	P	A	A	I	A	A	A	P	P	P	P	P	A	A	A	A	A	P	A	184	Lycaenidae	Polyommatinae
Cupido alcetas	P	P	P	A	A	P	P	P	A	P	A	A	I	P	A	P	P	A	A	P	P	A	A	A	P	A	P	P	A	A	I	A	A	A	P	P	P	P	P	P	A	A	P	A	P	A	185	Lycaenidae	Polyommatinae
Cupido osiris	P	A	P	A	A	P	P	P	A	A	A	A	A	P	Ex	P	P	A	A	P	A	A	A	A	P	A	P	P	A	A	A	A	A	A	P	P	P	P	P	P	A	A	P	P	P	A	186	Lycaenidae	Polyommatinae
Cupido minimus	P	P	P	P	P	P	P	P	A	P	P	P	P	P	P	P	P	A	P	P	P	P	P	P	P	A	P	P	Ex	P	P	P	A	A	P	P	P	P	P	P	A	P	P	A	P	P	187	Lycaenidae	Polyommatinae
Cupido lorquinii	A	A	A	A	A	A	A	A	A	A	A	A	A	A	A	A	A	A	A	A	A	A	A	A	A	A	A	A	A	A	A	P	A	A	A	A	A	A	A	P	A	A	A	A	A	A	188	Lycaenidae	Polyommatinae
Luthrodes galba	A	A	A	A	A	A	A	A	P	A	A	A	A	A	A	A	A	A	A	A	A	A	A	A	A	A	A	A	A	A	A	A	A	A	A	A	A	A	A	A	A	A	A	A	A	A	189	Lycaenidae	Polyommatinae
Freyeria trochylus	A	A	A	A	A	A	P	A	P	A	A	A	A	A	A	P	A	A	A	A	A	A	A	A	A	A	A	A	A	A	A	A	A	A	A	A	A	A	A	A	A	A	A	A	A	A	190	Lycaenidae	Polyommatinae
Plebejus argus	P	P	P	P	P	P	P	P	A	P	P	P	P	P	P	P	P	A	A	P	P	P	P	P	P	I	P	P	P	P	P	P	A	A	P	P	P	P	P	P	A	P	P	P	P	P	191	Lycaenidae	Polyommatinae
Plebejus idas	P	P	P	P	Ex	P	P	P	A	P	P	P	P	P	P	P	P	A	A	P	P	P	P	I	P	A	P	P	Ex	P	P	A	A	A	P	P	P	P	P	P	A	P	P	A	P	A	192	Lycaenidae	Polyommatinae
Plebejus bellieri	A	A	A	A	A	A	A	A	A	A	A	A	A	P	A	A	A	A	A	P	A	A	A	A	A	A	A	A	A	A	A	A	A	A	A	A	A	A	A	A	A	A	A	A	A	A	193	Lycaenidae	Polyommatinae
Plebejus argyrognomon	P	A	P	P	Ex	P	P	P	A	P	A	A	A	P	P	P	P	A	A	P	P	A	P	A	P	A	P	P	A	P	P	A	A	A	P	P	P	P	P	A	A	P	P	A	P	A	194	Lycaenidae	Polyommatinae
Agriades orbitulus	A	A	P	A	A	A	A	A	A	A	A	A	A	P	P	A	A	A	A	P	A	P	A	A	A	A	A	A	A	P	A	A	A	A	A	P	A	A	P	A	A	P	P	A	A	A	195	Lycaenidae	Polyommatinae
Agriades optilete	A	A	P	P	A	A	A	A	A	P	P	P	P	P	P	A	A	A	A	P	P	A	P	A	P	A	A	A	P	P	P	A	A	A	Ex	P	P	P	P	A	A	P	P	A	P	A	196	Lycaenidae	Polyommatinae
Agriades pyrenaicus	A	A	A	A	A	A	A	A	A	A	A	A	A	P	A	A	A	A	A	A	A	A	A	A	A	A	A	A	A	A	A	A	A	A	A	A	A	A	A	P	A	A	A	A	A	A	197	Lycaenidae	Polyommatinae
Agriades dardanus	A	A	A	A	A	P	P	A	A	A	A	A	A	A	A	P	A	A	A	A	A	A	A	A	A	A	A	A	A	A	A	A	A	A	A	P	A	A	A	A	A	A	A	A	P	A	198	Lycaenidae	Polyommatinae
Agriades zullichi	A	A	A	A	A	A	A	A	A	A	A	A	A	A	A	A	A	A	A	A	A	A	A	A	A	A	A	A	A	A	A	A	A	A	A	A	A	A	A	P	A	A	A	A	A	A	199	Lycaenidae	Polyommatinae
Agriades glandon	A	P	P	A	A	A	A	A	A	A	A	A	A	P	P	A	A	A	A	P	A	P	A	A	A	A	A	A	A	A	A	A	A	A	A	A	A	A	A	P	A	A	P	A	A	A	200	Lycaenidae	Polyommatinae
Agriades aquilo	A	A	A	A	A	A	A	A	A	A	A	A	P	A	A	A	A	A	A	A	A	A	A	A	A	A	A	A	A	P	A	A	A	A	A	P	A	A	A	A	A	P	A	A	A	A	201	Lycaenidae	Polyommatinae
Plebejidea loewii	A	A	A	A	A	A	A	A	A	A	A	A	A	A	A	P	A	A	A	A	A	A	A	A	A	A	A	A	A	A	A	A	A	A	A	P	A	A	A	A	A	A	A	A	A	A	202	Lycaenidae	Polyommatinae
Eumedonia eumedon	P	P	P	P	A	P	P	P	A	P	A	P	P	P	P	P	P	A	A	P	P	P	P	A	P	A	P	P	A	P	P	P	A	A	P	P	P	P	P	P	A	P	P	A	P	A	203	Lycaenidae	Polyommatinae
Kretania psylorita	A	A	A	A	A	A	A	A	A	A	A	A	A	A	A	P	A	A	A	A	A	A	A	A	A	A	A	A	A	A	A	A	A	A	A	A	A	A	A	A	A	A	A	A	A	A	204	Lycaenidae	Polyommatinae
Kretania hesperica	A	A	A	A	A	A	A	A	A	A	A	A	A	A	A	A	A	A	A	A	A	A	A	A	A	A	A	A	A	A	A	A	A	A	A	A	A	A	A	P	A	A	A	A	A	A	205	Lycaenidae	Polyommatinae
Kretania eurypilus	A	A	A	A	A	A	A	A	A	A	A	A	A	A	A	P	A	A	A	A	A	A	A	A	A	A	A	A	A	A	A	A	A	A	A	P	A	A	A	A	A	A	A	A	A	A	206	Lycaenidae	Polyommatinae
Kretania trappi	A	A	A	A	A	A	A	A	A	A	A	A	A	A	A	A	A	A	A	P	A	A	A	A	A	A	A	A	A	A	A	A	A	A	A	A	A	A	A	A	A	A	P	A	A	A	207	Lycaenidae	Polyommatinae
Kretania sephirus	P	A	A	A	A	A	P	A	A	A	A	A	A	A	A	P	P	A	A	A	A	A	A	A	P	A	P	P	A	A	A	A	A	A	P	P	P	A	A	A	A	A	A	P	P	A	208	Lycaenidae	Polyommatinae
Kretania pylaon	A	A	A	A	A	A	A	A	A	A	A	A	A	A	A	A	A	A	A	A	A	A	A	A	A	A	A	A	A	A	A	A	A	A	A	P	A	A	A	A	A	A	A	A	P	A	209	Lycaenidae	Polyommatinae
Cyaniris semiargus	P	P	P	P	P	P	P	P	A	P	P	P	P	P	P	P	P	A	A	P	P	P	P	P	P	A	P	P	P	P	P	P	A	A	P	P	P	P	P	P	A	P	P	P	P	Ex	210	Lycaenidae	Polyommatinae
Glabroculus cyane	A	A	A	A	A	A	A	A	A	A	A	A	A	A	A	A	A	A	A	A	A	A	A	A	A	A	A	A	A	A	A	A	A	A	A	P	A	A	A	A	A	A	A	A	A	A	211	Lycaenidae	Polyommatinae
Aricia morronensis	A	P	A	A	A	A	A	A	A	A	A	A	A	P	A	A	A	A	A	A	A	A	A	A	A	A	A	A	A	A	A	A	A	A	A	A	A	A	A	P	A	A	A	A	A	A	212	Lycaenidae	Polyommatinae
Aricia anteros	P	A	A	A	A	P	P	P	A	A	A	A	A	A	A	P	A	A	A	A	A	A	A	A	P	A	A	P	A	A	A	A	A	A	Ex	A	P	A	A	A	A	A	A	P	P	A	213	Lycaenidae	Polyommatinae
Aricia cramera	A	A	A	A	A	A	A	A	A	A	A	A	A	A	A	A	A	A	A	P	A	A	A	A	A	A	A	A	A	A	A	P	A	A	A	A	A	A	A	P	P	A	A	A	A	A	214	Lycaenidae	Polyommatinae
Aricia nicias	A	P	A	A	A	A	A	A	A	A	A	A	P	P	A	A	A	A	A	P	A	A	A	A	A	A	A	A	A	P	A	A	A	A	A	P	A	A	A	P	A	P	P	A	A	A	215	Lycaenidae	Polyommatinae
Aricia artaxerxes	P	A	P	P	A	P	P	P	A	P	P	P	P	P	P	P	P	A	A	P	P	P	P	A	P	A	A	P	A	P	P	A	A	A	P	P	P	P	P	A	A	P	P	A	P	P	216	Lycaenidae	Polyommatinae
Aricia montensis	A	P	A	A	A	A	A	A	A	A	A	A	A	A	A	A	A	A	A	A	A	A	A	A	A	A	A	A	A	A	A	P	A	A	A	A	A	A	A	P	A	A	A	A	A	A	217	Lycaenidae	Polyommatinae
Aricia agestis	P	A	P	P	P	P	P	P	P	P	P	A	A	P	P	P	P	A	A	P	A	A	P	P	P	P	P	P	P	A	P	A	A	A	P	P	P	P	P	P	A	P	P	P	P	P	218	Lycaenidae	Polyommatinae
Neolysandra coelestina	A	A	A	A	A	A	A	A	A	A	A	A	A	A	A	P	A	A	A	A	A	A	A	A	A	A	A	A	A	A	A	A	A	A	A	P	A	A	A	A	A	A	A	A	P	A	219	Lycaenidae	Polyommatinae
Lysandra hispana	A	A	A	A	A	A	A	A	A	A	A	A	A	P	A	A	A	A	A	P	A	A	A	A	A	A	A	A	A	A	A	A	A	A	A	A	A	A	A	P	A	A	A	A	A	A	220	Lycaenidae	Polyommatinae
Lysandra corydonius	A	A	A	A	A	A	A	A	A	A	A	A	A	A	A	A	A	A	A	A	A	A	A	A	A	A	A	A	A	A	A	A	A	A	A	P	A	A	A	A	A	A	A	A	A	A	221	Lycaenidae	Polyommatinae
Lysandra bellargus	P	P	P	P	P	P	P	P	A	P	A	I	A	P	P	P	P	A	A	P	A	P	I	P	P	A	P	P	A	A	P	P	A	A	P	P	P	P	P	P	A	A	P	P	P	P	222	Lycaenidae	Polyommatinae
Lysandra coridon	P	P	P	P	P	P	P	P	A	P	A	A	A	P	P	P	P	A	A	P	A	P	P	P	P	A	P	P	I	A	P	A	A	A	P	P	P	P	P	P	A	A	P	P	P	P	223	Lycaenidae	Polyommatinae
Lysandra caelestissima	A	A	A	A	A	A	A	A	A	A	A	A	A	A	A	A	A	A	A	A	A	A	A	A	A	A	A	A	A	A	A	A	A	A	A	A	A	A	A	P	A	A	A	A	A	A	224	Lycaenidae	Polyommatinae
Lysandra albicans	A	A	A	A	A	A	A	A	A	A	A	A	A	A	A	A	A	A	A	A	A	A	A	A	A	A	A	A	A	A	A	A	A	A	A	A	A	A	A	P	A	A	A	A	A	A	225	Lycaenidae	Polyommatinae
Polyommatus escheri	P	P	A	A	A	P	P	P	A	A	A	A	A	P	A	P	A	A	A	P	A	A	A	A	P	A	A	P	A	A	A	A	A	A	A	A	A	A	P	P	A	A	P	P	A	A	226	Lycaenidae	Polyommatinae
Polyommatus thersites	P	P	P	A	Ex	P	P	P	A	P	A	A	A	P	P	P	P	A	A	P	A	A	A	A	P	P?	P	P	A	A	P	P	A	A	P	P	P	P	P	P	A	A	P	P	P	A	227	Lycaenidae	Polyommatinae
Polyommatus daphnis	P	A	P	P	A	P	P	P	A	P	A	A	A	P	P	P	P	A	A	P	A	A	P	A	P	A	P	P	A	A	P	A	A	A	P	P	P	P	P	P	A	A	P	P	P	A	228	Lycaenidae	Polyommatinae
Polyommatus amandus	P	P	P	P	A	P	P	P	A	P	P	P	P	P	P	P	P	A	A	P	P	A	P	A	P	A	P	P	A	P	P	A	A	A	P	P	P	P	P	P	A	P	P	P	P	A	229	Lycaenidae	Polyommatinae
Polyommatus golgus	A	A	A	A	A	A	A	A	A	A	A	A	A	A	A	A	A	A	A	A	A	A	A	A	A	A	A	A	A	A	A	A	A	A	A	A	A	A	A	P	A	A	A	A	A	A	230	Lycaenidae	Polyommatinae
Polyommatus nivescens	A	A	A	A	A	A	A	A	A	A	A	A	A	A	A	A	A	A	A	A	A	A	A	A	A	A	A	A	A	A	A	A	A	A	A	A	A	A	A	P	A	A	A	A	A	A	231	Lycaenidae	Polyommatinae
Polyommatus dorylas	P	P	P	P	Ex	P	P	P	A	P	A	A	A	P	P	P	P	A	A	P	A	A	P	I	P	A	A	P	A	A	P	A	A	A	P	P	P	P	P	P	A	P	P	A	P	A	232	Lycaenidae	Polyommatinae
Polyommatus celina	A	A	A	A	A	A	A	A	A	A	A	A	A	A	A	A	A	A	A	P	A	A	A	A	A	P	A	A	A	A	A	P	A	A	A	A	A	A	A	P	P	A	A	A	A	A	233	Lycaenidae	Polyommatinae
Polyommatus icarus	P	P	P	P	P	P	P	P	P	P	P	P	P	P	P	P	P	A	P	P	P	P	P	P	P	A	P	P	P	P	P	P	A	A	P	P	P	P	P	P	A	P	P	P	P	P	234	Lycaenidae	Polyommatinae
Polyommatus eros	P	P	P	P	A	P	P	P	A	Ex	A	A	A	P	P	P	A	A	A	P	A	P	A	A	P	A	A	P	A	A	P	A	A	A	A	P	P	P	A	P	A	A	P	A	P	A	235	Lycaenidae	Polyommatinae
Polyommatus damon	P	P	P	A	A	P	P	P	A	P	A	A	A	P	P	P	Ex	A	A	P	P	P	A	A	P	A	A	P	A	A	Ex	A	A	A	Ex	P	P	Ex	A	P	A	A	P	A	P	A	236	Lycaenidae	Polyommatinae
Polyommatus damone	A	A	A	A	A	A	A	A	A	A	A	A	A	A	A	A	A	A	A	A	A	A	A	A	A	A	A	A	A	A	A	A	A	A	A	P	A	A	A	A	A	A	A	A	P	A	237	Lycaenidae	Polyommatinae
Polyommatus damocles	A	A	A	A	A	A	A	A	A	A	A	A	A	A	A	A	A	A	A	A	A	A	A	A	A	A	A	A	A	A	A	A	A	A	A	P	A	A	A	A	A	A	A	A	P	A	238	Lycaenidae	Polyommatinae
Polyommatus admetus	P	A	Ex	A	A	P	P	P	A	A	A	A	A	A	A	P	P	A	A	A	A	A	A	A	P	A	A	P	A	A	A	A	A	A	P	A	P	P	A	A	A	A	A	P	A	A	239	Lycaenidae	Polyommatinae
Polyommatus ripartii	P	A	A	A	A	P	P	P	A	A	A	A	A	P	A	P	A	A	A	P	A	A	A	A	P	A	A	A	A	A	P	A	A	A	P?	P	P	A	A	P	A	A	A	P	P	A	240	Lycaenidae	Polyommatinae
Polyommatus nephohiptamenos	A	A	A	A	A	A	P	A	A	A	A	A	A	A	A	P	A	A	A	A	A	A	A	A	A	A	A	A	A	A	A	A	A	A	A	A	A	A	A	A	A	A	A	A	A	A	241	Lycaenidae	Polyommatinae
Polyommatus iphigenia	A	A	A	A	A	A	A	A	A	A	A	A	A	A	A	P	A	A	A	A	A	A	A	A	A	A	A	A	A	A	A	A	A	A	A	A	A	A	A	A	A	A	A	A	A	A	242	Lycaenidae	Polyommatinae
Polyommatus violetae	A	A	A	A	A	A	A	A	A	A	A	A	A	A	A	A	A	A	A	A	A	A	A	A	A	A	A	A	A	A	A	A	A	A	A	A	A	A	A	P	A	A	A	A	A	A	243	Lycaenidae	Polyommatinae
Polyommatus fulgens	A	A	A	A	A	A	A	A	A	A	A	A	A	A	A	A	A	A	A	A	A	A	A	A	A	A	A	A	A	A	A	A	A	A	A	A	A	A	A	P	A	A	A	A	A	A	244	Lycaenidae	Polyommatinae
Polyommatus fabressei	A	A	A	A	A	A	A	A	A	A	A	A	A	A	A	A	A	A	A	A	A	A	A	A	A	A	A	A	A	A	A	A	A	A	A	A	A	A	A	P	A	A	A	A	A	A	245	Lycaenidae	Polyommatinae
Polyommatus dolus	A	A	A	A	A	A	A	A	A	A	A	A	A	P	A	A	A	A	A	P	A	A	A	A	A	A	A	A	A	A	A	A	A	A	A	A	A	A	A	A	A	A	A	A	A	A	246	Lycaenidae	Polyommatinae
Polyommatus humedasae	A	A	A	A	A	A	A	A	A	A	A	A	A	A	A	A	A	A	A	P	A	A	A	A	A	A	A	A	A	A	A	A	A	A	A	A	A	A	A	A	A	A	A	A	A	A	247	Lycaenidae	Polyommatinae
Polyommatus timfristos	A	A	A	A	A	A	A	A	A	A	A	A	A	A	A	P	A	A	A	A	A	A	A	A	A	A	A	A	A	A	A	A	A	A	A	A	A	A	A	A	A	A	A	A	A	A	248	Lycaenidae	Polyommatinae
Polyommatus orphicus	A	A	A	A	A	A	P	A	A	A	A	A	A	A	A	P	A	A	A	A	A	A	A	A	P	A	A	A	A	A	A	A	A	A	A	A	A	A	A	A	A	A	A	A	A	A	249	Lycaenidae	Polyommatinae
Polyommatus aroaniensis	A	A	A	A	A	P	P	A	A	A	A	A	A	A	A	P	A	A	A	A	A	A	A	A	P	A	A	A	A	A	A	A	A	A	A	A	A	A	A	A	A	A	A	A	A	A	250	Lycaenidae	Polyommatinae
Neptis sappho	A	A	P	P	A	P	P	P	A	Ex	A	A	A	A	A	P	P	A	A	P	A	A	A	A	P	A	P	P	A	A	Ex	A	A	A	P	P	P	P	P	A	A	A	A	A	P	A	251	Nymphalidae	Limenitidinae
Neptis rivularis	P	A	P	P	A	P	P	P	A	P	A	A	A	Ex	A	P	P	A	A	P	A	A	A	A	P	A	P?	P	A	A	P	A	A	A	P	P	P	P	P	A	A	A	P	A	P	A	252	Nymphalidae	Limenitidinae
Limenitis reducta	P	P	P	A	A	P	P	P	P	Ex	A	A	A	P	P	P	P	A	A	P	A	A	A	A	P	A	P?	P	A	A	A	P	A	A	P	P	P	P	P	P	A	A	P	P	P	A	253	Nymphalidae	Limenitidinae
Limenitis populi	A	A	P	P	P	P	P	P	A	P	Ex	P	P	P	P	P	P	A	A	P	P	A	P	P	P	A	A	P	Ex	P	P	A	A	A	P	P	P	P	P	A	A	P	P	A	P	A	254	Nymphalidae	Limenitidinae
Limenitis camilla	A	P	P	P	P	P	P	P	A	P	P	P	P	P	P	P	P	A	A	P	P	P	P	P	P	A	P	P	P	A	P	P	A	A	P	P	P	P	P	P	A	I	P	P	P	P	255	Nymphalidae	Limenitidinae
Issoria lathonia	P	P	P	P	P	P	P	P	I	P	P	P	P	P	P	P	P	A	A	P	P	M	P	P	P	A	P	P	P	P	P	P	A	P	P	P	P	P	P	P	I	P	P	P	P	I	256	Nymphalidae	Heliconiinae
Issoria eugenia	A	A	A	A	A	A	A	A	A	A	A	A	A	A	A	A	A	A	A	A	A	A	A	A	A	A	A	A	A	A	A	A	A	A	A	P	A	A	A	A	A	A	A	A	A	A	257	Nymphalidae	Heliconiinae
Brenthis hecate	P	A	P	A	A	P	P	P	A	P	A	A	A	P	A	P	P	A	A	P	A	A	P	A	P	A	A	P	A	A	A	P	A	A	P	P	P	P	P	P	A	A	A	P	P	A	258	Nymphalidae	Heliconiinae
Brenthis ino	P	P	P	P	P	P	P	P	A	P	P	P	P	P	P	A	P	A	A	P	P	P	P	P	P	A	P	P	Ex	P	P	P	A	A	P	P	P	P	P	P	A	P	P	A	P	A	259	Nymphalidae	Heliconiinae
Brenthis daphne	P	P	P	P	P	P	P	P	A	P	A	A	A	P	P	P	P	A	A	P	P	A	P	P	P	A	P	P	I	A	P	P	A	A	P	P	P	P	P	P	A	A	P	P	P	A	260	Nymphalidae	Heliconiinae
Argynnis paphia	P	P	P	P	P	P	P	P	A	P	P	P	P	P	P	P	P	A	P	P	P	P	P	P	P	A	P	P	P	P	P	P	A	A	P	P	P	P	P	P	A	P	P	P	P	P	261	Nymphalidae	Heliconiinae
Argynnis pandora	P	P	I	A	A	P	P	P	P	I	A	A	A	P	A	P	P	A	A	P	A	A	A	A	P	A	P	P	A	A	I	P	A	A	P	P	P	I	P	P	P	A	P	P	P	A	262	Nymphalidae	Heliconiinae
Argynnis laodice	A	A	A	P	A	A	A	A	A	A	I	P	P	A	P	A	P	A	A	A	P	A	P	A	A	A	A	A	A	A	P	A	A	A	P	P	A	P	A	A	A	I	A	A	P	A	263	Nymphalidae	Heliconiinae
Speyeria aglaja	P	P	P	P	P	P	P	P	A	P	P	P	P	P	P	P	P	A	P	P	P	P	P	P	P	A	P	P	P	P	P	P	A	A	P	P	P	P	P	P	A	P	P	P	P	P	264	Nymphalidae	Heliconiinae
Fabriciana elisa	A	A	A	A	A	A	A	A	A	A	A	A	A	P	A	A	A	A	A	P	A	A	A	A	A	A	A	A	A	A	A	A	A	A	A	A	A	A	A	A	A	A	A	A	A	A	265	Nymphalidae	Heliconiinae
Fabriciana niobe	P	P	P	P	Ex	P	P	P	A	P	P	P	P	P	P	P	P	A	A	P	P	P	P	I	P	A	P	P	P	P	P	P	A	A	P	P	P	P	P	P	A	P	P	P	P	A	266	Nymphalidae	Heliconiinae
Fabriciana adippe	P	P	P	P	P	P	P	P	A	P	P	P	P	P	P	P	P	A	A	P	P	P	P	P	P	A	P	P	I	P	P	P	A	A	P	P	P	P	P	P	A	P	P	P	P	P	267	Nymphalidae	Heliconiinae
Boloria eunomia	A	P	P	P	P	A	P	A	A	P	A	P	P	P	P	A	A	A	A	P	P	A	P	P	A	A	A	A	A	P	P	A	A	A	A	P	P	Ex	A	P	A	P	A	A	P	A	268	Nymphalidae	Heliconiinae
Boloria graeca	P	A	A	A	A	P	P	A	A	A	A	A	A	P	A	P	A	A	A	P	A	A	A	A	P	A	A	P	A	A	A	A	A	A	A	A	P	A	A	A	A	A	A	A	A	A	269	Nymphalidae	Heliconiinae
Boloria pales	P	P	P	A	A	P	P	A	A	A	A	A	A	P	P	A	A	A	A	P	A	P	A	A	P	A	A	P	A	A	P	A	A	A	P	A	P	P	P	P	A	A	P	A	A	A	270	Nymphalidae	Heliconiinae
Boloria alaskensis	A	A	A	A	A	A	A	A	A	A	A	A	A	A	A	A	A	A	A	A	A	A	A	A	A	A	A	A	A	A	A	A	A	A	A	P	A	A	A	A	A	A	A	A	A	A	271	Nymphalidae	Heliconiinae
Boloria napaea	A	A	P	A	A	A	A	A	A	A	A	A	P	P	P	A	A	A	A	P	A	P	A	A	A	A	A	A	A	P	A	A	A	A	A	P	A	A	A	P	A	P	P	A	A	A	272	Nymphalidae	Heliconiinae
Boloria aquilonaris	A	A	P	P	P	A	A	A	A	P	P	P	P	P	P	A	A	A	A	A	P	A	P	A	A	A	A	A	P	P	P	A	A	A	P	P	A	P	A	A	A	P	P	A	P	A	273	Nymphalidae	Heliconiinae
Boloria tritonia	A	A	A	A	A	A	A	A	A	A	A	A	A	A	A	A	A	A	A	A	A	A	A	A	A	A	A	A	A	A	A	A	A	A	A	P	A	A	A	A	A	A	A	A	A	A	274	Nymphalidae	Heliconiinae
Boloria polaris	A	A	A	A	A	A	A	A	A	A	A	A	P	A	A	A	A	A	A	A	A	A	A	A	A	A	A	A	A	P	A	A	A	A	A	P	A	A	A	A	A	P	A	A	A	A	275	Nymphalidae	Heliconiinae
Boloria thore	A	A	P	P	A	A	A	A	A	A	A	A	P	A	P	A	A	A	A	P	A	P	P?	A	A	A	A	A	A	P	A	A	A	A	A	P	A	A	P	A	A	P	P	A	A	A	276	Nymphalidae	Heliconiinae
Boloria selene	A	P	P	P	P	P	P	P	A	P	P	P	P	P	P	P	P	A	A	P	P	P	P	P	A	A	A	A	P	P	P	P	A	A	P	P	P	P	P	P	A	P	P	A	P	P	277	Nymphalidae	Heliconiinae
Boloria euphrosyne	P	P	P	P	P	P	P	P	A	P	P	P	P	P	P	P	P	A	P	P	P	P	P	Ex	P	A	P	P	Ex	P	P	P	A	A	P	P	P	P	P	P	A	P	P	A	P	P	278	Nymphalidae	Heliconiinae
Boloria dia	P	P	P	P	P	P	P	P	A	P	Ex	P	A	P	P	P	P	A	A	P	P	P	P	P	P	A	P	P	I	A	P	P	A	A	P	P	P	P	P	P	A	A	P	P	P	A	279	Nymphalidae	Heliconiinae
Boloria improba	A	A	A	A	A	A	A	A	A	A	A	A	P	A	A	A	A	A	A	A	A	A	A	A	A	A	A	A	A	P	A	A	A	A	A	P	A	A	A	A	A	P	A	A	A	A	280	Nymphalidae	Heliconiinae
Boloria frigga	A	A	A	P	A	A	A	A	A	A	A	P	P	A	A	A	A	A	A	A	P	A	P	A	A	A	A	A	A	P	A	A	A	A	A	P	A	A	A	A	A	P	A	A	A	A	281	Nymphalidae	Heliconiinae
Boloria freija	A	A	A	P	A	A	A	A	A	A	A	Ex	P	A	A	A	A	A	A	A	P	A	A	A	A	A	A	A	A	P	A	A	A	A	A	P	A	A	A	A	A	P	A	A	A	A	282	Nymphalidae	Heliconiinae
Boloria selenis	A	A	A	A	A	A	A	A	A	A	A	A	A	A	A	A	A	A	A	A	A	A	A	A	A	A	A	A	A	A	A	A	A	A	A	P	A	A	A	A	A	A	A	A	A	A	283	Nymphalidae	Heliconiinae
Boloria oscarus	A	A	A	A	A	A	A	A	A	A	A	A	A	A	A	A	A	A	A	A	A	A	A	A	A	A	A	A	A	A	A	A	A	A	A	P	A	A	A	A	A	A	A	A	A	A	284	Nymphalidae	Heliconiinae
Boloria titania	P	A	P	A	A	P	A	P	A	A	A	P	P	P	P	A	A	A	A	P	P	P	A	A	A	A	A	P	A	A	Ex	A	A	A	P	P	P	A	P	A	A	A	P	A	Ex	A	285	Nymphalidae	Heliconiinae
Boloria chariclea	A	A	A	A	A	A	A	A	A	A	A	A	P	A	A	A	A	A	A	A	A	A	A	A	A	A	A	A	A	P	A	A	A	A	A	P	A	A	A	A	A	P	A	A	A	A	286	Nymphalidae	Heliconiinae
Boloria angarensis	A	A	A	A	A	A	A	A	A	A	A	A	A	A	A	A	A	A	A	A	A	A	A	A	A	A	A	A	A	A	A	A	A	A	A	P	A	A	A	A	A	A	A	A	A	A	287	Nymphalidae	Heliconiinae
Apatura iris	P	P	P	P	P	P	P	P	A	P	P	P	P	P	P	P	P	A	A	P	P	P	P	P	P	A	A	P	P	A	P	P	A	A	P	P	P	P	P	P	A	P	P	A	P	P	288	Nymphalidae	Apaturinae
Apatura metis	P	A	P	A	A	P	P	P	A	A	A	A	A	A	A	P	P	A	A	A	A	A	A	A	A	A	P	P	A	A	A	A	A	A	P	P	P	P	A	A	A	A	A	P	P	A	289	Nymphalidae	Apaturinae
Apatura ilia	P	P	P	P	P	P	P	P	A	P	P	P	P	P	P	P	P	A	A	P	P	P	P	P	P	A	P	P	I	A	P	P	A	A	P	P	P	P	P	P	A	I	P	A	P	A	290	Nymphalidae	Apaturinae
Araschnia levana	A	A	P	P	P	P	P	P	A	P	P	P	P	P	P	P	P	A	A	P	P	A	P	P	P	A	P	P	P	I	P	A	A	A	P	P	P	P	P	P	A	P	P	A	P	I	291	Nymphalidae	Nymphalinae
Vanessa virginiensis	A	A	A	A	A	A	A	A	A	A	A	A	A	I	A	A	A	A	A	A	A	A	A	A	A	A	A	A	A	A	A	P	I	A	A	A	A	A	A	P	I	A	A	A	A	A	292	Nymphalidae	Nymphalinae
Vanessa cardui	M	M	M	M	M	M	M	M	M	M	M	M	M	M	M	M	M	M	M	M	M	M	M	M	M	M	M	M	M	M	M	P	P	P	M	M	M	M	M	P	P	M	M	M	M	M	293	Nymphalidae	Nymphalinae
Vanessa vulcania	A	A	A	A	A	A	A	A	A	A	A	A	A	A	A	A	A	A	A	A	A	A	A	A	A	A	A	A	A	A	A	A	A	P	A	A	A	A	A	A	P	A	A	A	A	A	294	Nymphalidae	Nymphalinae
Vanessa atalanta	P	M	P	M	P	P	P	P	P	M	M	M	M	P	M	P	M	M	P	P	P	M	P	M	M	P	P	P	M	M	M	P	P	P	P	P	P	P	P	P	P	M	M	P	P	P	295	Nymphalidae	Nymphalinae
Aglais io	P	P	P	P	P	P	P	P	A	P	P	P	P	P	P	P	P	I	P	P	P	P	P	P	P	I	P	P	P	P	P	P	A	A	P	P	P	P	P	P	A	P	P	P	P	P	296	Nymphalidae	Nymphalinae
Aglais urticae	P	P	P	P	P	P	P	P	A	P	P	P	P	P	P	P	P	I	P	P	P	P	P	P	P	A	P	P	P	P	P	P	A	A	P	P	P	P	P	P	A	P	P	P	P	P	297	Nymphalidae	Nymphalinae
Aglais ichnusa	A	A	A	A	A	A	A	A	A	A	A	A	A	P	A	A	A	A	A	P	A	A	A	A	A	A	A	A	A	A	A	A	A	A	A	A	A	A	A	A	A	A	A	A	A	A	298	Nymphalidae	Nymphalinae
Polygonia egea	P	A	A	A	A	P	P	P	A	I	A	A	A	P	A	P	A	A	A	P	A	A	A	A	P	I	A	P	A	A	A	A	A	A	Ex	P	I	A	P	A	A	A	I	P	A	A	299	Nymphalidae	Nymphalinae
Polygonia c-album	P	P	P	P	P	P	P	P	A	P	P	P	P	P	P	P	P	A	P	P	P	P	P	P	P	A	P	P	P	P	P	P	A	A	P	P	P	P	P	P	A	P	P	P	P	P	300	Nymphalidae	Nymphalinae
Nymphalis vaualbum	A	A	P	I	A	P	P	P	A	Ex	I	Ex	I	A	A	A	I	A	A	A	P	A	A	A	I	A	A	I	A	A	I	A	A	A	P	P	P	Ex	Ex	A	A	I	A	A	P	A	301	Nymphalidae	Nymphalinae
Nymphalis polychloros	P	P	P	P	P	P	P	P	A	P	M	P	P	P	P	P	P	A	A	P	P	P	P	P	M	I	P	P	P	I	P	P	A	A	P	P	P	P	P	P	A	P	P	P	P	Ex	302	Nymphalidae	Nymphalinae
Nymphalis xanthomelas	P	A	Ex	P	I	P	P	P	A	P	I	P	P	I	I	P	P	A	A	A	P	A	P	A	P	A	P	I	I	I	P	A	A	A	P	P	P	P	Ex	A	A	P	A	A	P	I	303	Nymphalidae	Nymphalinae
Nymphalis antiopa	P	P	P	P	P	P	P	P	A	P	P	P	P	P	P	P	P	A	A	P	P	P	P	P	M	I	P	P	I	P	P	P	A	A	P	P	P	P	P	P	A	P	P	P	P	I	304	Nymphalidae	Nymphalinae
Hypolimnas misippus	A	A	A	A	A	A	A	A	A	A	A	A	A	A	A	A	A	A	A	A	A	A	A	A	A	A	A	A	A	A	A	A	I	I	A	A	A	A	A	A	I	A	A	A	A	A	305	Nymphalidae	Nymphalinae
Euphydryas desfontainii	A	A	A	A	A	A	A	A	A	A	A	A	A	P	A	A	A	A	A	A	A	A	A	A	A	A	A	A	A	A	A	P	A	A	A	A	A	A	A	P	A	A	A	A	A	A	306	Nymphalidae	Nymphalinae
Euphydryas aurinia	P	P	P	P	P	P	P	P	A	P	P	P	P	P	P	P	P	A	P	P	P	P	P	P	P	A	A	P	Ex	A	P	P	A	A	P	P	P	P	P	P	A	P	P	P	P	P	307	Nymphalidae	Nymphalinae
Euphydryas cynthia	A	A	P	A	A	A	P	A	A	A	A	A	A	P	P	A	A	A	A	P	A	P	A	A	A	A	A	A	A	A	A	A	A	A	A	A	A	A	A	A	A	A	P	A	A	A	308	Nymphalidae	Nymphalinae
Euphydryas iduna	A	A	A	A	A	A	A	A	A	A	A	A	P	A	A	A	A	A	A	A	A	A	A	A	A	A	A	A	A	P	A	A	A	A	A	P	A	A	A	A	A	P	A	A	A	A	309	Nymphalidae	Nymphalinae
Euphydryas maturna	P	A	P	P	Ex	P	P	P	A	P	Ex	P	P	P	P	A	P	A	A	P	P	A	P	I	P	A	P	P	A	A	P	A	A	A	P	P	P	P	P	A	A	P	A	A	P	A	310	Nymphalidae	Nymphalinae
Euphydryas intermedia	A	A	P	A	A	A	A	A	A	A	A	A	A	P	A	A	A	A	A	P	A	A	A	A	A	A	A	A	A	A	A	A	A	A	A	P	A	A	P	A	A	A	P	A	A	A	311	Nymphalidae	Nymphalinae
Melitaea trivia	P	P	P	A	A	P	P	P	A	Ex	A	A	A	A	A	P	P	A	A	P	A	A	A	A	P	A	P	P	A	A	A	P	A	A	P	P	P	P	P	P	A	A	A	P	P	A	312	Nymphalidae	Nymphalinae
Melitaea didyma	P	P	P	P	A	P	P	P	A	P	A	I	A	P	P	P	P	A	A	P	P	P	P	I	P	A	A	P	I	A	P	P	A	A	P	P	P	P	P	P	A	A	P	P	P	A	313	Nymphalidae	Nymphalinae
Melitaea arduinna	A	A	A	A	A	A	P	A	A	A	A	A	A	A	A	P	A	A	A	A	A	A	A	A	P	A	A	A	A	A	A	A	A	A	P	P	P	A	A	A	A	A	A	A	P	A	314	Nymphalidae	Nymphalinae
Melitaea aetherie	A	A	A	A	A	A	A	A	A	A	A	A	A	A	A	A	A	A	A	P	A	A	A	A	A	A	A	A	A	A	A	P	A	A	A	A	A	A	A	P	A	A	A	A	A	A	315	Nymphalidae	Nymphalinae
Melitaea phoebe	P	P	P	P	Ex	P	P	P	A	P	A	P	A	P	P	P	P	A	A	P	P	P	P	Ex	P	A	P	P	A	A	P	P	A	A	P	P	P	P	P	P	A	A	P	P	P	A	316	Nymphalidae	Nymphalinae
Melitaea ornata	P	A	A	A	A	A	P	P	A	A	A	A	A	P	A	P	P	A	A	P	A	A	A	A	P	A	A	P	A	A	A	A	A	A	P	P	P	P	P	P	A	A	A	A	P	A	317	Nymphalidae	Nymphalinae
Melitaea cinxia	P	P	P	P	P	P	P	P	A	P	P	P	P	P	P	P	P	A	A	P	P	A	P	P	P	A	P	P	P	P	P	P	A	A	P	P	P	P	P	P	A	P	P	P	P	P	318	Nymphalidae	Nymphalinae
Melitaea diamina	P	P	P	P	P	P	P	P	A	P	Ex	P	P	P	P	A	P	A	A	P	P	P	P	P	P	A	P	P	Ex	P	P	A	A	A	P	P	P	P	P	P	A	P	P	A	P	A	319	Nymphalidae	Nymphalinae
Melitaea celadussa	A	P	A	A	A	A	A	A	A	A	A	A	A	P	A	A	A	A	A	P	A	A	A	A	A	A	A	A	A	A	A	P	A	A	A	A	A	A	A	P	A	A	P	A	A	A	320	Nymphalidae	Nymphalinae
Melitaea deione	A	P	A	A	A	A	A	A	A	A	A	A	A	P	A	A	A	A	A	P	A	A	A	A	A	A	A	A	A	A	A	P	A	A	A	A	A	A	A	P	A	A	P	A	A	A	321	Nymphalidae	Nymphalinae
Melitaea britomartis	A	A	P	P	A	P	P	P	A	P	A	A	A	A	P	A	P	A	A	P	A	A	P	A	A	A	A	A	A	A	P	A	A	A	P	P	A	P	P	A	A	P	P	A	P	A	322	Nymphalidae	Nymphalinae
Melitaea athalia	P	A	P	P	P	P	P	P	A	P	P	P	P	P	P	P	P	A	A	P	P	P	P	P	P	A	P	P	P	P	P	A	A	A	P	P	P	P	P	A	A	P	P	P	P	P	323	Nymphalidae	Nymphalinae
Melitaea varia	A	A	P	A	A	A	A	A	A	A	A	A	A	P	A	A	A	A	A	P	A	A	A	A	A	A	A	A	A	A	A	A	A	A	A	A	A	A	A	A	A	A	P	A	A	A	324	Nymphalidae	Nymphalinae
Melitaea parthenoides	A	P	P	A	A	A	A	A	A	A	A	A	A	P	P	A	A	A	A	P	A	A	A	A	A	A	A	A	A	A	A	P	A	A	A	A	A	A	A	P	A	A	P	A	A	A	325	Nymphalidae	Nymphalinae
Melitaea aurelia	P	A	P	P	P	P	P	P	A	P	A	P	A	P	P	P	P	A	A	P	P	P	P	P	P	A	P	P	I	A	P	A	A	A	P	P	P	P	P	A	A	A	P	A	P	A	326	Nymphalidae	Nymphalinae
Melitaea asteria	A	A	P	A	A	A	A	A	A	A	A	A	A	A	A	A	A	A	A	P	A	A	A	A	A	A	A	A	A	A	A	A	A	A	A	A	A	A	A	A	A	A	P	A	A	A	327	Nymphalidae	Nymphalinae
Libythea celtis	P	M	P	A	A	P	P	P	P	A	A	A	A	P	A	P	P	A	A	P	A	A	A	A	P	A	A	P	A	A	A	P	A	A	P	P	P	P	P	P	A	A	P	P	P	A	328	Nymphalidae	Libytheinae
Danaus plexippus	A	A	A	A	A	A	A	A	A	A	I	A	A	I	A	A	A	A	A	A	A	A	A	A	A	A	A	A	I	A	A	I	P	P	A	A	A	A	A	P	P	I	A	A	A	I	329	Nymphalidae	Danainae
Danaus chrysippus	M	A	A	A	A	I	A	M	M	A	A	A	A	P	A	M	A	A	A	P	A	A	A	A	A	M	A	I	A	A	A	A	A	A	A	A	A	A	A	P	P	A	A	A	I	A	330	Nymphalidae	Danainae
Charaxes jasius	P	A	A	A	A	P	A	P	P	A	A	A	A	P	A	P	A	A	A	P	A	A	A	A	A	A	A	P	A	A	A	P	A	A	A	A	A	A	A	P	A	A	A	A	A	A	331	Nymphalidae	Charaxinae
Coenonympha phryne	A	A	A	A	A	A	A	A	A	A	A	A	A	A	A	A	A	A	A	A	A	A	A	A	A	A	A	A	A	A	A	A	A	A	A	P	A	A	A	A	A	A	A	A	P	A	332	Nymphalidae	Satyrinae
Coenonympha oedippus	A	A	P	P	A	A	Ex	P	A	A	A	A	A	P	P	A	P	A	A	P	A	P	A	A	A	A	A	A	A	A	P	A	A	A	A	P	A	Ex	P	A	A	A	P	A	P	A	333	Nymphalidae	Satyrinae
Coenonympha dorus	A	P	A	A	A	A	A	A	A	A	A	A	A	P	A	A	A	A	A	P	A	A	A	A	A	A	A	A	A	A	A	P	A	A	A	A	A	A	A	P	A	A	Ex	A	A	A	334	Nymphalidae	Satyrinae
Coenonympha thyrsis	A	A	A	A	A	A	A	A	A	A	A	A	A	A	A	P	A	A	A	A	A	A	A	A	A	A	A	A	A	A	A	A	A	A	A	A	A	A	A	A	A	A	A	A	A	A	335	Nymphalidae	Satyrinae
Coenonympha pamphilus	P	P	P	P	P	P	P	P	A	P	P	P	P	P	P	P	P	A	P	P	P	P	P	P	P	P	P	P	P	P	P	P	A	A	P	P	P	P	P	P	A	P	P	P	P	P	336	Nymphalidae	Satyrinae
Coenonympha tullia	A	A	P	P	P	P	A	A	A	P	P	P	P	P	P	A	Ex	A	P	A	P	A	P	A	A	A	A	A	P	P	P	A	A	A	P	P	A	P	P	A	A	P	P	A	P	P	337	Nymphalidae	Satyrinae
Coenonympha rhodopensis	P	A	A	A	A	P	P	P	A	A	A	A	A	A	A	P	A	A	A	P	A	A	A	A	P	A	A	P	A	A	A	A	A	A	P	A	P	A	A	A	A	A	A	A	A	A	338	Nymphalidae	Satyrinae
Coenonympha amaryllis	A	A	A	A	A	A	A	A	A	A	A	A	A	A	A	A	A	A	A	A	A	A	A	A	A	A	A	A	A	A	A	A	A	A	A	P	A	A	A	A	A	A	A	A	A	A	339	Nymphalidae	Satyrinae
Coenonympha glycerion	P?	P	P	P	Ex	P	P	P	A	P	A	P	P	P	P	P	P	A	A	P	P	P	P	I	P	A	P	P	A	A	P	P	A	A	P	P	P	P	P	P	A	A	P	A	P	A	340	Nymphalidae	Satyrinae
Coenonympha corinna	A	A	A	A	A	A	A	A	A	A	A	A	A	P	A	A	A	A	A	P	A	A	A	A	A	A	A	A	A	A	A	A	A	A	A	A	A	A	A	A	A	A	A	A	A	A	341	Nymphalidae	Satyrinae
Coenonympha leander	P	A	A	A	A	A	P	A	A	A	A	A	A	A	A	P	A	A	A	A	A	A	A	A	P	A	A	A	A	A	A	A	A	A	P	P	P	A	A	A	A	A	A	A	P	A	342	Nymphalidae	Satyrinae
Coenonympha hero	A	A	P	P	Ex	A	A	A	A	Ex	Ex	P	I	P	P	A	A	A	A	A	P	A	P	I	A	A	A	A	Ex	P	P	A	A	A	A	P	A	P	A	A	A	P	P	A	P	A	343	Nymphalidae	Satyrinae
Coenonympha gardetta	A	A	P	A	A	A	A	A	A	A	A	A	A	P	P	A	A	A	A	P	A	P	A	A	A	A	A	A	A	A	A	A	A	A	A	A	A	A	P	A	A	A	P	A	A	A	344	Nymphalidae	Satyrinae
Coenonympha orientalis	P	A	A	A	A	P	A	A	A	A	A	A	A	A	A	P	A	A	A	A	A	A	A	A	A	A	A	P	A	A	A	A	A	A	A	A	P	A	A	A	A	A	A	A	A	A	345	Nymphalidae	Satyrinae
Coenonympha arcania	P	P	P	P	P	P	P	P	A	P	Ex	P	A	P	P	P	P	A	A	P	P	A	P	P	P	A	P	P	Ex	P	P	P	A	A	P	P	P	P	P	P	A	P	P	P	P	A	346	Nymphalidae	Satyrinae
Kirinia roxelana	P	A	A	A	A	P	P	P	P	A	A	A	A	A	A	P	A	A	A	A	A	A	A	A	P	A	A	P	A	A	A	A	A	A	P	A	P	A	A	A	A	A	A	P	A	A	347	Nymphalidae	Satyrinae
Kirinia climene	P	A	A	A	A	A	P	A	A	A	A	A	A	A	A	P	A	A	A	A	A	A	A	A	P	A	P?	A	A	A	A	A	A	A	Ex	P	P	A	A	A	A	A	A	A	P	A	348	Nymphalidae	Satyrinae
Lopinga achine	A	A	P	P	Ex	Ex	P	P	A	P	A	P	P	P	P	A	P	A	A	P	P	A	P	I	A	A	P?	A	I	A	P	A	A	A	P	P	P	P	P	P	A	P	P	A	P	A	349	Nymphalidae	Satyrinae
Pararge xiphia	A	A	A	A	A	A	A	A	A	A	A	A	A	A	A	A	A	A	A	A	A	A	A	A	A	A	A	A	A	A	A	A	A	P	A	A	A	A	A	A	A	A	A	A	A	A	350	Nymphalidae	Satyrinae
Pararge xiphioides	A	A	A	A	A	A	A	A	A	A	A	A	A	A	A	A	A	A	A	A	A	A	A	A	A	A	A	A	A	A	A	A	A	A	A	A	A	A	A	A	P	A	A	A	A	A	351	Nymphalidae	Satyrinae
Pararge aegeria	P	P	P	P	P	P	P	P	P	P	P	P	P	P	P	P	P	A	P	P	P	P	P	P	P	P	P	P	P	P	P	P	A	P	P	P	P	P	P	P	A	P	P	P	P	P	352	Nymphalidae	Satyrinae
Lasiommata maera	P	P	P	P	P	P	P	P	P	P	I	P	P	P	P	P	P	A	A	P	P	P	P	P	P	A	P	P	I	P	P	P	A	A	P	P	P	P	P	P	A	P	P	P	P	A	353	Nymphalidae	Satyrinae
Lasiommata deidamia	A	A	A	A	A	A	A	A	A	A	A	A	A	A	A	A	A	A	A	A	A	A	A	A	A	A	A	A	A	A	A	A	A	A	A	P	A	A	A	A	A	A	A	A	A	A	354	Nymphalidae	Satyrinae
Lasiommata petropolitana	P	A	P	P	A	P	P	P	A	Ex	I	P	P	P	P	P	A	A	A	P	P	P	P	A	P	A	A	P	A	P	P	A	A	A	A	P	P	P	P	P	A	P	P	A	P	A	355	Nymphalidae	Satyrinae
Lasiommata paramegaera	A	A	A	A	A	A	A	A	A	A	A	A	A	P	A	A	A	A	A	P	A	A	A	A	A	A	A	A	A	A	A	A	A	A	A	A	A	A	A	A	A	A	A	A	A	A	356	Nymphalidae	Satyrinae
Lasiommata megera	P	P	P	P	P	P	P	P	P	P	P	A	P	P	P	P	P	A	P	P	P	P	P	P	P	P	P	P	P	P	P	P	A	A	P	P	P	P	P	P	A	P	P	P	P	P	357	Nymphalidae	Satyrinae
Melanargia russiae	P	P	A	A	A	A	A	A	A	A	A	A	A	P	A	P	Ex	A	A	P	A	A	A	A	P	A	P	A	A	A	A	P	A	A	A	P	A	A	A	P	A	A	A	A	P	A	358	Nymphalidae	Satyrinae
Melanargia larissa	P	A	A	A	A	P	P	P	A	A	A	A	A	A	A	P	A	A	A	A	A	A	A	A	P	A	A	P	A	A	A	A	A	A	P	A	P	A	A	A	A	A	A	P	A	A	359	Nymphalidae	Satyrinae
Melanargia lachesis	A	P	A	A	A	A	A	A	A	A	A	A	A	P	A	A	A	A	A	A	A	A	A	A	A	A	A	A	A	A	A	P	A	A	A	A	A	A	A	P	A	A	A	A	A	A	360	Nymphalidae	Satyrinae
Melanargia galathea	P	A	P	P	P	P	P	P	A	P	I	I	A	P	P	P	P	A	A	P	P	P	P	P	P	A	P	P	I	A	P	A	A	A	P	P	P	P	P	P	A	I	P	P	P	P	361	Nymphalidae	Satyrinae
Melanargia ines	A	A	A	A	A	A	A	A	A	A	A	A	A	A	A	A	A	A	A	A	A	A	A	A	A	A	A	A	A	A	A	P	A	A	A	A	A	A	A	P	A	A	A	A	A	A	362	Nymphalidae	Satyrinae
Melanargia arge	A	A	A	A	A	A	A	A	A	A	A	A	A	A	A	A	A	A	A	P	A	A	A	A	A	A	A	A	A	A	A	A	A	A	A	A	A	A	A	A	A	A	A	A	A	A	363	Nymphalidae	Satyrinae
Melanargia pherusa	A	A	A	A	A	A	A	A	A	A	A	A	A	A	A	A	A	A	A	P	A	A	A	A	A	A	A	A	A	A	A	A	A	A	A	A	A	A	A	A	A	A	A	A	A	A	364	Nymphalidae	Satyrinae
Melanargia occitanica	A	A	A	A	A	A	A	A	A	A	A	A	A	P	A	A	A	A	A	P	A	A	A	A	A	A	A	A	A	A	A	P	A	A	A	A	A	A	A	P	A	A	A	A	A	A	365	Nymphalidae	Satyrinae
Hipparchia fatua	P	A	A	A	A	A	P	A	A	A	A	A	A	A	A	P	A	A	A	A	A	A	A	A	P	A	A	P?	A	A	A	A	A	A	A	A	A	A	A	A	A	A	A	P	A	A	366	Nymphalidae	Satyrinae
Hipparchia statilinus	P	P	P	P	Ex	P	P	P	A	Ex	A	A	A	P	P	P	P	A	A	P	A	A	P	A	P	A	P	P	P	A	P	P	A	A	P	P	P	P	P	P	A	A	P	P	P	A	367	Nymphalidae	Satyrinae
Hipparchia tilosi	A	A	A	A	A	A	A	A	A	A	A	A	A	A	A	A	A	A	A	A	A	A	A	A	A	A	A	A	A	A	A	A	A	A	A	A	A	A	A	A	P	A	A	A	A	A	368	Nymphalidae	Satyrinae
Hipparchia bacchus	A	A	A	A	A	A	A	A	A	A	A	A	A	A	A	A	A	A	A	A	A	A	A	A	A	A	A	A	A	A	A	A	A	A	A	A	A	A	A	A	P	A	A	A	A	A	369	Nymphalidae	Satyrinae
Hipparchia wyssii	A	A	A	A	A	A	A	A	A	A	A	A	A	A	A	A	A	A	A	A	A	A	A	A	A	A	A	A	A	A	A	A	A	A	A	A	A	A	A	A	P	A	A	A	A	A	370	Nymphalidae	Satyrinae
Hipparchia tamadabae	A	A	A	A	A	A	A	A	A	A	A	A	A	A	A	A	A	A	A	A	A	A	A	A	A	A	A	A	A	A	A	A	A	A	A	A	A	A	A	A	P	A	A	A	A	A	371	Nymphalidae	Satyrinae
Hipparchia gomera	A	A	A	A	A	A	A	A	A	A	A	A	A	A	A	A	A	A	A	A	A	A	A	A	A	A	A	A	A	A	A	A	A	A	A	A	A	A	A	A	P	A	A	A	A	A	372	Nymphalidae	Satyrinae
Hipparchia fidia	A	P	A	A	A	A	A	A	A	A	A	A	A	P	A	A	A	A	A	P	A	A	A	A	A	A	A	A	A	A	A	P	A	A	A	A	A	A	A	P	A	A	A	A	A	A	373	Nymphalidae	Satyrinae
Hipparchia neomiris	A	A	A	A	A	A	A	A	A	A	A	A	A	P	A	A	A	A	A	P	A	A	A	A	A	A	A	A	A	A	A	A	A	A	A	A	A	A	A	A	A	A	A	A	A	A	374	Nymphalidae	Satyrinae
Hipparchia autonoe	A	A	A	A	A	A	A	A	A	A	A	A	A	A	A	A	A	A	A	A	A	A	A	A	A	A	A	A	A	A	A	A	A	A	A	P	A	A	A	A	A	A	A	A	A	A	375	Nymphalidae	Satyrinae
Hipparchia hermione	A	P	P	P	A	A	A	A	A	P	A	A	A	P	P	A	A	A	A	P	P	A	P	I	A	A	A	A	A	P	P	P	A	A	A	P	A	P	A	P	A	A	P	A	P	A	376	Nymphalidae	Satyrinae
Hipparchia syriaca	P	A	A	A	A	P	P	P	P	A	A	A	A	A	A	P	A	A	A	A	A	A	A	A	P	A	A	P	A	A	A	A	A	A	P	P	P	A	A	A	A	A	A	P	A	A	377	Nymphalidae	Satyrinae
Hipparchia fagi	P	A	P	A	A	P	P	P	A	P	A	A	A	P	P	P	P	A	A	P	A	A	A	A	P	A	P?	P	I	A	A	A	A	A	P	P	P	P	P	P	A	A	P	A	P	A	378	Nymphalidae	Satyrinae
Hipparchia mersina	A	A	A	A	A	A	A	A	A	A	A	A	A	A	A	P	A	A	A	A	A	A	A	A	A	A	A	A	A	A	A	A	A	A	A	A	A	A	A	A	A	A	A	A	A	A	379	Nymphalidae	Satyrinae
Hipparchia miguelensis	A	A	A	A	A	A	A	A	A	A	A	A	A	A	A	A	A	A	A	A	A	A	A	A	A	A	A	A	A	A	A	A	P	A	A	A	A	A	A	A	A	A	A	A	A	A	380	Nymphalidae	Satyrinae
Hipparchia azorina	A	A	A	A	A	A	A	A	A	A	A	A	A	A	A	A	A	A	A	A	A	A	A	A	A	A	A	A	A	A	A	A	P	A	A	A	A	A	A	A	A	A	A	A	A	A	381	Nymphalidae	Satyrinae
Hipparchia senthes	P	A	A	A	A	A	P	A	A	A	A	A	A	A	A	P	A	A	A	A	A	A	A	A	P	A	A	A	A	A	A	A	A	A	A	A	A	A	A	A	A	A	A	P	A	A	382	Nymphalidae	Satyrinae
Hipparchia maderensis	A	A	A	A	A	A	A	A	A	A	A	A	A	A	A	A	A	A	A	A	A	A	A	A	A	A	A	A	A	A	A	A	A	P	A	A	A	A	A	A	A	A	A	A	A	A	383	Nymphalidae	Satyrinae
Hipparchia semele	P	P	P	P	P	P	P	P	A	P	P	P	P	P	P	A	P	A	P	P	P	P	P	P	A	A	A	P?	P	P	P	P	A	A	P	P	P	P	P	P	A	P	P	A	P	P	384	Nymphalidae	Satyrinae
Hipparchia blachieri	A	A	A	A	A	A	A	A	A	A	A	A	A	A	A	A	A	A	A	P	A	A	A	A	A	I	A	A	A	A	A	A	A	A	A	A	A	A	A	A	A	A	A	A	A	A	385	Nymphalidae	Satyrinae
Hipparchia aristaeus	A	A	A	A	A	A	A	A	A	A	A	A	A	P	A	A	A	A	A	P	A	A	A	A	A	A	A	A	A	A	A	A	A	A	A	A	A	A	A	A	A	A	A	A	A	A	386	Nymphalidae	Satyrinae
Hipparchia volgensis	P	A	A	A	A	A	P	A	A	A	A	A	A	A	A	P	A	A	A	A	A	A	A	A	P	A	A	P	A	A	A	A	A	A	P	P	P	A	A	A	A	A	A	P	P	A	387	Nymphalidae	Satyrinae
Hipparchia neapolitana	A	A	A	A	A	A	A	A	A	A	A	A	A	A	A	A	A	A	A	P	A	A	A	A	A	A	A	A	A	A	A	A	A	A	A	A	A	A	A	A	A	A	A	A	A	A	388	Nymphalidae	Satyrinae
Hipparchia leighebi	A	A	A	A	A	A	A	A	A	A	A	A	A	A	A	A	A	A	A	P	A	A	A	A	A	A	A	A	A	A	A	A	A	A	A	A	A	A	A	A	A	A	A	A	A	A	389	Nymphalidae	Satyrinae
Hipparchia pellucida	A	A	A	A	A	A	A	A	A	A	A	A	A	A	A	A	A	A	A	A	A	A	A	A	A	A	A	A	A	A	A	A	A	A	A	P	A	A	A	A	A	A	A	A	P	A	390	Nymphalidae	Satyrinae
Hipparchia sbordonii	A	A	A	A	A	A	A	A	A	A	A	A	A	A	A	A	A	A	A	P	A	A	A	A	A	A	A	A	A	A	A	A	A	A	A	A	A	A	A	A	A	A	A	A	A	A	391	Nymphalidae	Satyrinae
Hipparchia cypriensis	A	A	A	A	A	A	A	A	P	A	A	A	A	A	A	A	A	A	A	A	A	A	A	A	A	A	A	A	A	A	A	A	A	A	A	A	A	A	A	A	A	A	A	A	A	A	392	Nymphalidae	Satyrinae
Hipparchia cretica	A	A	A	A	A	A	A	A	A	A	A	A	A	A	A	P	A	A	A	A	A	A	A	A	A	A	A	A	A	A	A	A	A	A	A	A	A	A	A	A	A	A	A	A	A	A	393	Nymphalidae	Satyrinae
Hipparchia christenseni	A	A	A	A	A	A	A	A	A	A	A	A	A	A	A	P	A	A	A	A	A	A	A	A	A	A	A	A	A	A	A	A	A	A	A	A	A	A	A	A	A	A	A	A	A	A	394	Nymphalidae	Satyrinae
Minois dryas	P	A	P	P	A	P	P	P	A	P	A	A	A	P	P	P	P	A	A	P	A	P	A	A	P	A	P	P	A	A	P	A	A	A	P	P	P	P	P	P	A	A	P	P	P	A	395	Nymphalidae	Satyrinae
Brintesia circe	P	P	P	A	A	P	P	P	A	P	A	A	A	P	P	P	P	A	A	P	A	A	A	I	P	A	P	P	A	A	I	P	A	A	P	P	P	P	P	P	A	A	P	P	P	A	396	Nymphalidae	Satyrinae
Arethusana arethusa	P	P	P	A	I	P	P	P	A	P	A	A	A	P	Ex	P	P	A	A	P	A	A	A	A	P	A	P	P	I	A	A	P	A	A	P	P	P	P	P	P	A	A	Ex	P	P	A	397	Nymphalidae	Satyrinae
Oeneis tarpeia	A	A	A	A	A	A	A	A	A	A	A	A	A	A	A	A	A	A	A	A	A	A	A	A	A	A	A	A	A	A	A	A	A	A	A	P	A	A	A	A	A	A	A	A	Ex	A	398	Nymphalidae	Satyrinae
Oeneis bore	A	A	A	A	A	A	A	A	A	A	A	A	P	A	A	A	A	A	A	A	A	A	A	A	A	A	A	A	A	P	A	A	A	A	A	P	A	A	A	A	A	P	A	A	A	A	399	Nymphalidae	Satyrinae
Oeneis ammon	A	A	A	A	A	A	A	A	A	A	A	A	A	A	A	A	A	A	A	A	A	A	A	A	A	A	A	A	A	A	A	A	A	A	A	P	A	A	A	A	A	A	A	A	A	A	400	Nymphalidae	Satyrinae
Oeneis melissa	A	A	A	A	A	A	A	A	A	A	A	A	A	A	A	A	A	A	A	A	A	A	A	A	A	A	A	A	A	A	A	A	A	A	A	P	A	A	A	A	A	A	A	A	A	A	401	Nymphalidae	Satyrinae
Oeneis magna	A	A	A	A	A	A	A	A	A	A	A	A	A	A	A	A	A	A	A	A	A	A	A	A	A	A	A	A	A	A	A	A	A	A	A	P	A	A	A	A	A	A	A	A	A	A	402	Nymphalidae	Satyrinae
Oeneis jutta	A	A	A	P	A	A	A	A	A	A	A	P	P	A	A	A	A	A	A	A	P	A	P	A	A	A	A	A	A	P	P	A	A	A	A	P	A	A	A	A	A	P	A	A	P	A	403	Nymphalidae	Satyrinae
Oeneis norna	A	A	A	A	A	A	A	A	A	A	A	A	P	A	A	A	A	A	A	A	A	A	A	A	A	A	A	A	A	P	A	A	A	A	A	P	A	A	A	A	A	P	A	A	A	A	404	Nymphalidae	Satyrinae
Oeneis polixenes	A	A	A	A	A	A	A	A	A	A	A	A	A	A	A	A	A	A	A	A	A	A	A	A	A	A	A	A	A	A	A	A	A	A	A	P	A	A	A	A	A	A	A	A	A	A	405	Nymphalidae	Satyrinae
Oeneis glacialis	A	A	P	A	A	A	A	A	A	A	A	A	A	P	P	A	A	A	A	P	A	P	A	A	A	A	A	A	A	A	A	A	A	A	A	A	A	A	A	A	A	A	P	A	A	A	406	Nymphalidae	Satyrinae
Satyrus ferula	P	A	A	A	A	P	P	P	A	A	A	A	A	P	A	P	A	A	A	P	A	A	A	A	P	A	A	P	A	A	A	A	A	A	P	P	P	A	P	P	A	A	P	A	A	A	407	Nymphalidae	Satyrinae
Satyrus virbius	A	A	A	A	A	A	A	A	A	A	A	A	A	A	A	A	A	A	A	A	A	A	A	A	A	A	A	A	A	A	A	A	A	A	A	P	A	A	A	A	A	A	A	A	P	A	408	Nymphalidae	Satyrinae
Satyrus actaea	A	P	A	A	A	A	A	A	A	A	A	A	A	P	A	A	A	A	A	P	A	A	A	A	A	A	A	A	A	A	A	P	A	A	A	A	A	A	A	P	A	A	A	A	A	A	409	Nymphalidae	Satyrinae
Chazara briseis	P	P	P	A	Ex	P	P	P	P	P	A	A	A	P	P	P	P	A	A	A	A	A	A	I	P	A	P	P	A	A	Ex	A	A	A	P	P	P	P	Ex	P	A	A	P	P	P	A	410	Nymphalidae	Satyrinae
Chazara prieuri	A	A	A	A	A	A	A	A	A	A	A	A	A	A	A	A	A	A	A	A	A	A	A	A	A	A	A	A	A	A	A	A	A	A	A	A	A	A	A	P	A	A	A	A	A	A	411	Nymphalidae	Satyrinae
Chazara persephone	A	A	A	A	A	A	A	A	I	A	A	A	A	A	A	A	A	A	A	A	A	A	A	A	A	A	A	A	A	A	A	A	A	A	A	P	A	A	A	A	A	A	A	A	P	A	412	Nymphalidae	Satyrinae
Pseudochazara geyeri	P	A	A	A	A	A	A	A	A	A	A	A	A	A	A	P	A	A	A	A	A	A	A	A	P	A	A	A	A	A	A	A	A	A	A	A	A	A	A	A	A	A	A	A	A	A	413	Nymphalidae	Satyrinae
Pseudochazara graeca	A	A	A	A	A	A	A	A	A	A	A	A	A	A	A	P	A	A	A	A	A	A	A	A	A	A	A	A	A	A	A	A	A	A	A	A	A	A	A	A	A	A	A	A	A	A	414	Nymphalidae	Satyrinae
Pseudochazara amymone	P	A	A	A	A	A	A	A	A	A	A	A	A	A	A	P	A	A	A	A	A	A	A	A	A	A	A	A	A	A	A	A	A	A	A	A	A	A	A	A	A	A	A	A	A	A	415	Nymphalidae	Satyrinae
Pseudochazara anthelea	A	A	A	A	A	A	A	A	P	A	A	A	A	A	A	P	A	A	A	A	A	A	A	A	A	A	A	A	A	A	A	A	A	A	A	A	A	A	A	A	A	A	A	A	A	A	416	Nymphalidae	Satyrinae
Pseudochazara amalthea	P	A	A	A	A	P	P	P	A	A	A	A	A	A	A	P	A	A	A	A	A	A	A	A	P	A	A	A	A	A	A	A	A	A	A	A	A	A	A	A	A	A	A	A	A	A	417	Nymphalidae	Satyrinae
Pseudochazara williamsi	A	A	A	A	A	A	A	A	A	A	A	A	A	A	A	A	A	A	A	A	A	A	A	A	A	A	A	A	A	A	A	A	A	A	A	A	A	A	A	P	A	A	A	A	A	A	418	Nymphalidae	Satyrinae
Pseudochazara euxina	A	A	A	A	A	A	A	A	A	A	A	A	A	A	A	A	A	A	A	A	A	A	A	A	A	A	A	A	A	A	A	A	A	A	A	A	A	A	A	A	A	A	A	A	P	A	419	Nymphalidae	Satyrinae
Pseudochazara mercurius	A	A	A	A	A	A	A	A	A	A	A	A	A	A	A	A	A	A	A	A	A	A	A	A	A	A	A	A	A	A	A	A	A	A	A	P	A	A	A	A	A	A	A	A	A	A	420	Nymphalidae	Satyrinae
Pseudochazara cingovskii	A	A	A	A	A	A	A	A	A	A	A	A	A	A	A	A	A	A	A	A	A	A	A	A	P	A	A	A	A	A	A	A	A	A	A	A	A	A	A	A	A	A	A	A	A	A	421	Nymphalidae	Satyrinae
Pseudochazara tisiphone	P	A	A	A	A	A	A	A	A	A	A	A	A	A	A	P	A	A	A	A	A	A	A	A	A	A	A	A	A	A	A	A	A	A	A	A	A	A	A	A	A	A	A	A	A	A	422	Nymphalidae	Satyrinae
Pseudochazara orestes	A	A	A	A	A	A	P	A	A	A	A	A	A	A	A	P	A	A	A	A	A	A	A	A	A	A	A	A	A	A	A	A	A	A	A	A	A	A	A	A	A	A	A	A	A	A	423	Nymphalidae	Satyrinae
Ypthima asterope	A	A	A	A	A	A	A	A	P	A	A	A	A	A	A	P	A	A	A	A	A	A	A	A	A	A	A	A	A	A	A	A	A	A	A	A	A	A	A	A	A	A	A	A	A	A	424	Nymphalidae	Satyrinae
Proterebia phegea	A	A	A	A	A	P	A	P	A	A	A	A	A	A	A	P	A	A	A	A	A	A	A	A	A	A	A	A	A	A	A	A	A	A	A	P	A	A	A	A	A	A	A	A	P	A	425	Nymphalidae	Satyrinae
Hyponephele huebneri	A	A	A	A	A	A	A	A	A	A	A	A	A	A	A	A	A	A	A	A	A	A	A	A	A	A	A	A	A	A	A	A	A	A	A	P	A	A	A	A	A	A	A	A	A	A	426	Nymphalidae	Satyrinae
Hyponephele lycaon	P	P	P	P	A	P	P	P	A	P	A	P	P	P	P	P	Ex	A	A	P	P	A	P	A	P	A	P	P	A	A	P	P	A	A	P	P	P	P	Ex	P	A	A	P	A	P	A	427	Nymphalidae	Satyrinae
Hyponephele lupina	P	A	A	A	A	P	P	P	P	Ex	A	A	A	P	A	P	P	A	A	P	A	A	A	A	P	A	A	P?	A	A	A	P	A	A	P	P	P	P	A	P	A	A	A	P	P	A	428	Nymphalidae	Satyrinae
Aphantopus hyperantus	P	P	P	P	P	P	P	P	A	P	P	P	P	P	P	P	P	A	P	P	P	P	P	P	P	A	P	P	P	P	P	A	A	A	P	P	P	P	P	P	A	P	P	A	P	P	429	Nymphalidae	Satyrinae
Pyronia cecilia	P	A	A	A	A	A	A	P	A	A	A	A	A	P	A	P	A	A	A	P	A	A	A	A	A	A	A	P?	A	A	A	P	A	A	A	A	A	A	A	P	A	A	A	P	A	A	430	Nymphalidae	Satyrinae
Pyronia tithonus	P	P	A	A	P	P	P	P	A	Ex	Ex	A	A	P	P	P	P	A	P	P	A	A	A	P	P	A	A	P	P	A	P	P	A	A	P	A	P	Ex	P	P	A	A	P	P	Ex	P	431	Nymphalidae	Satyrinae
Pyronia bathseba	A	A	A	A	A	A	A	A	A	A	A	A	A	P	A	A	A	A	A	A	A	A	A	A	A	A	A	A	A	A	A	P	A	A	A	A	A	A	A	P	A	A	A	A	A	A	432	Nymphalidae	Satyrinae
Maniola jurtina	P	P	P	P	P	P	P	P	A	P	P	P	P	P	P	P	P	A	P	P	P	P	P	P	P	P	P	P	P	P	P	P	A	A	P	P	P	P	P	P	P	P	P	P	P	P	433	Nymphalidae	Satyrinae
Maniola nurag	A	A	A	A	A	A	A	A	A	A	A	A	A	A	A	A	A	A	A	P	A	A	A	A	A	A	A	A	A	A	A	A	A	A	A	A	A	A	A	A	A	A	A	A	A	A	434	Nymphalidae	Satyrinae
Maniola chia	A	A	A	A	A	A	A	A	A	A	A	A	A	A	A	P	A	A	A	A	A	A	A	A	A	A	A	A	A	A	A	A	A	A	A	A	A	A	A	A	A	A	A	A	A	A	435	Nymphalidae	Satyrinae
Maniola megala	A	A	A	A	A	A	A	A	A	A	A	A	A	A	A	P	A	A	A	A	A	A	A	A	A	A	A	A	A	A	A	A	A	A	A	A	A	A	A	A	A	A	A	A	A	A	436	Nymphalidae	Satyrinae
Maniola cypricola	A	A	A	A	A	A	A	A	P	A	A	A	A	A	A	A	A	A	A	A	A	A	A	A	A	A	A	A	A	A	A	A	A	A	A	A	A	A	A	A	A	A	A	A	A	A	437	Nymphalidae	Satyrinae
Maniola telmessia	A	A	A	A	A	A	A	A	A	A	A	A	A	A	A	P	A	A	A	A	A	A	A	A	A	A	A	A	A	A	A	A	A	A	A	A	A	A	A	A	A	A	A	A	A	A	438	Nymphalidae	Satyrinae
Maniola halicarnassus	A	A	A	A	A	A	A	A	A	A	A	A	A	A	A	P	A	A	A	A	A	A	A	A	A	A	A	A	A	A	A	A	A	A	A	A	A	A	A	A	A	A	A	A	A	A	439	Nymphalidae	Satyrinae
Erebia edda	A	A	A	A	A	A	A	A	A	A	A	A	A	A	A	A	A	A	A	A	A	A	A	A	A	A	A	A	A	A	A	A	A	A	A	P	A	A	A	A	A	A	A	A	A	A	440	Nymphalidae	Satyrinae
Erebia fasciata	A	A	A	A	A	A	A	A	A	A	A	A	A	A	A	A	A	A	A	A	A	A	A	A	A	A	A	A	A	A	A	A	A	A	A	P	A	A	A	A	A	A	A	A	A	A	441	Nymphalidae	Satyrinae
Erebia discoidalis	A	A	A	A	A	A	A	A	A	A	A	A	A	A	A	A	A	A	A	A	A	A	A	A	A	A	A	A	A	A	A	A	A	A	A	P	A	A	A	A	A	A	A	A	A	A	442	Nymphalidae	Satyrinae
Erebia rossii	A	A	A	A	A	A	A	A	A	A	A	A	A	A	A	A	A	A	A	A	A	A	A	A	A	A	A	A	A	A	A	A	A	A	A	P	A	A	A	A	A	A	A	A	A	A	443	Nymphalidae	Satyrinae
Erebia cyclopius	A	A	A	A	A	A	A	A	A	A	A	A	A	A	A	A	A	A	A	A	A	A	A	A	A	A	A	A	A	A	A	A	A	A	A	P	A	A	A	A	A	A	A	A	A	A	444	Nymphalidae	Satyrinae
Erebia embla	A	A	A	A	A	A	A	A	A	A	A	P	P	A	A	A	A	A	A	A	P	A	A	A	A	A	A	A	A	P	A	A	A	A	A	P	A	A	A	A	A	P	A	A	A	A	445	Nymphalidae	Satyrinae
Erebia disa	A	A	A	A	A	A	A	A	A	A	A	A	P	A	A	A	A	A	A	A	A	A	A	A	A	A	A	A	A	P	A	A	A	A	A	P	A	A	A	A	A	P	A	A	A	A	446	Nymphalidae	Satyrinae
Erebia meolans	A	P	P	A	A	A	A	A	A	A	A	A	A	P	P	A	A	A	A	P	A	P	A	A	A	A	A	A	A	A	A	A	A	A	A	A	A	A	A	P	A	A	P	A	A	A	447	Nymphalidae	Satyrinae
Erebia dabanensis	A	A	A	A	A	A	A	A	A	A	A	A	A	A	A	A	A	A	A	A	A	A	A	A	A	A	A	A	A	A	A	A	A	A	A	P	A	A	A	A	A	A	A	A	A	A	448	Nymphalidae	Satyrinae
Erebia jeniseiensis	A	A	A	A	A	A	A	A	A	A	A	A	A	A	A	A	A	A	A	A	A	A	A	A	A	A	A	A	A	A	A	A	A	A	A	P	A	A	A	A	A	A	A	A	A	A	449	Nymphalidae	Satyrinae
Erebia claudina	A	A	P	A	A	A	A	A	A	A	A	A	A	A	A	A	A	A	A	P	A	A	A	A	A	A	A	A	A	A	A	A	A	A	A	A	A	A	A	A	A	A	A	A	A	A	450	Nymphalidae	Satyrinae
Erebia manto	A	A	P	A	A	P	A	A	A	A	A	A	A	P	P	A	A	A	A	P	A	P	A	A	A	A	A	P?	A	A	P	A	A	A	P	A	A	P	P	P	A	A	P	A	P	A	451	Nymphalidae	Satyrinae
Erebia ottomana	P	A	A	A	A	P	P	P	A	A	A	A	A	P	A	P	A	A	A	P	A	A	A	A	P	A	A	P	A	A	A	A	A	A	A	A	P	A	A	A	A	A	A	A	A	A	452	Nymphalidae	Satyrinae
Erebia hispania	A	A	A	A	A	A	A	A	A	A	A	A	A	P	A	A	A	A	A	A	A	A	A	A	A	A	A	A	A	A	A	A	A	A	A	A	A	A	A	P	A	A	A	A	A	A	453	Nymphalidae	Satyrinae
Erebia rondoui	A	A	A	A	A	A	A	A	A	A	A	A	A	P	A	A	A	A	A	A	A	A	A	A	A	A	A	A	A	A	A	A	A	A	A	A	A	A	A	P	A	A	A	A	A	A	454	Nymphalidae	Satyrinae
Erebia callias	A	A	A	A	A	A	A	A	A	A	A	A	A	A	A	A	A	A	A	A	A	A	A	A	A	A	A	A	A	A	A	A	A	A	A	P	A	A	A	A	A	A	A	A	A	A	455	Nymphalidae	Satyrinae
Erebia tyndarus	A	A	P	A	A	A	A	A	A	A	A	A	A	P	P	A	A	A	A	P	A	P	A	A	A	A	A	A	A	A	A	A	A	A	A	A	A	A	A	A	A	A	P	A	A	A	456	Nymphalidae	Satyrinae
Erebia cassioides	A	A	P	A	A	A	A	A	A	A	A	A	A	A	A	A	A	A	A	P	A	A	A	A	A	A	A	A	A	A	A	A	A	A	A	A	A	A	A	A	A	A	A	A	A	A	457	Nymphalidae	Satyrinae
Erebia nivalis	A	A	P	A	A	A	A	A	A	A	A	A	A	A	A	A	A	A	A	P	A	A	A	A	A	A	A	A	A	A	A	A	A	A	A	A	A	A	A	A	A	A	P	A	A	A	458	Nymphalidae	Satyrinae
Erebia neleus	P	A	A	A	A	P	P	A	A	A	A	A	A	A	A	P	A	A	A	A	A	A	A	A	P	A	A	P	A	A	A	A	A	A	P	A	P	A	A	A	A	A	A	A	A	A	459	Nymphalidae	Satyrinae
Erebia calcarius	A	A	P	A	A	A	A	A	A	A	A	A	A	A	A	A	A	A	A	P	A	A	A	A	A	A	A	A	A	A	A	A	A	A	A	A	A	A	P	A	A	A	A	A	A	A	460	Nymphalidae	Satyrinae
Erebia arvernensis	A	P	A	A	A	A	A	A	A	A	A	A	A	P	A	A	A	A	A	P	A	A	A	A	A	A	A	A	A	A	A	A	A	A	A	A	A	A	A	P	A	A	P	A	A	A	461	Nymphalidae	Satyrinae
Erebia oeme	P	P	P	A	A	P	P	P	A	A	A	A	A	P	P	P	A	A	A	P	A	P	A	A	P	A	A	P	A	A	A	A	A	A	P	A	P	A	P	P	A	A	P	A	A	A	462	Nymphalidae	Satyrinae
Erebia gorge	P	P	P	A	A	P	P	P	A	A	A	A	A	P	P	A	A	A	A	P	A	P	A	A	P	A	A	P	A	A	P	A	A	A	P	A	P	P	P	P	A	A	P	A	A	A	463	Nymphalidae	Satyrinae
Erebia sthennyo	A	A	A	A	A	A	A	A	A	A	A	A	A	P	A	A	A	A	A	A	A	A	A	A	A	A	A	A	A	A	A	A	A	A	A	A	A	A	A	P	A	A	A	A	A	A	464	Nymphalidae	Satyrinae
Erebia pandrose	P	P	P	A	A	P	P	A	A	A	A	A	P	P	P	A	A	A	A	P	A	P	A	A	P	A	A	P	A	P	P	A	A	A	P	P	P	P	P	P	A	P	P	A	A	A	465	Nymphalidae	Satyrinae
Erebia eriphyle	A	A	P	A	A	A	A	A	A	A	A	A	A	A	P	A	A	A	A	P	A	P	A	A	A	A	A	A	A	A	A	A	A	A	A	A	A	A	A	A	A	A	P	A	A	A	466	Nymphalidae	Satyrinae
Erebia epistygne	A	A	A	A	A	A	A	A	A	A	A	A	A	P	A	A	A	A	A	A	A	A	A	A	A	A	A	A	A	A	A	A	A	A	A	A	A	A	A	P	A	A	A	A	A	A	467	Nymphalidae	Satyrinae
Erebia euryale	P	P	P	A	A	P	P	P	A	P	A	A	I	P	P	P	A	A	A	P	A	P	A	A	P	A	A	P	A	A	P	A	A	A	P	P	P	P	P	P	A	A	P	A	P	A	468	Nymphalidae	Satyrinae
Erebia palarica	A	A	A	A	A	A	A	A	A	A	A	A	A	A	A	A	A	A	A	A	A	A	A	A	A	A	A	A	A	A	A	A	A	A	A	A	A	A	A	P	A	A	A	A	A	A	469	Nymphalidae	Satyrinae
Erebia ligea	P	A	P	P	P	P	P	P	A	P	I	P	P	P	P	P	Ex	A	A	P	P	P	P	A	P	A	A	P	I	P	P	A	A	A	P	P	P	P	P	A	A	P	P	A	P	A	470	Nymphalidae	Satyrinae
Erebia pluto	A	A	P	A	A	A	A	A	A	A	A	A	A	P	P	A	A	A	A	P	A	P	A	A	A	A	A	A	A	A	A	A	A	A	A	A	A	A	P	A	A	A	P	A	A	A	471	Nymphalidae	Satyrinae
Erebia aethiopellus	A	A	A	A	A	A	A	A	A	A	A	A	A	P	A	A	A	A	A	P	A	A	A	A	A	A	A	A	A	A	A	A	A	A	A	A	A	A	A	A	A	A	A	A	A	A	472	Nymphalidae	Satyrinae
Erebia gorgone	A	P	A	A	A	A	A	A	A	A	A	A	A	P	A	A	A	A	A	A	A	A	A	A	A	A	A	A	A	A	A	A	A	A	A	A	A	A	A	P	A	A	A	A	A	A	473	Nymphalidae	Satyrinae
Erebia rhodopensis	P	A	A	A	A	A	P	A	A	A	A	A	A	A	A	P	A	A	A	A	A	A	A	A	P	A	A	P	A	A	A	A	A	A	A	A	P	A	A	A	A	A	A	A	A	A	474	Nymphalidae	Satyrinae
Erebia mnestra	A	A	P	A	A	A	A	A	A	A	A	A	A	P	A	A	A	A	A	P	A	P	A	A	A	A	A	A	A	A	A	A	A	A	A	A	A	A	A	A	A	A	P	A	A	A	475	Nymphalidae	Satyrinae
Erebia albergana	A	A	P	A	A	A	P	A	A	A	A	A	A	P	A	A	A	A	A	P	A	A	A	A	P	A	A	P	A	A	A	A	A	A	A	A	P	A	A	A	A	A	P	A	A	A	476	Nymphalidae	Satyrinae
Erebia sudetica	A	A	A	A	A	A	A	A	A	P	A	A	A	P	A	A	A	A	A	A	A	A	A	A	A	A	A	A	A	A	Ex	A	A	A	P	A	A	A	A	A	A	A	P	A	A	A	477	Nymphalidae	Satyrinae
Erebia melampus	A	A	P	A	A	A	A	A	A	A	A	A	A	P	P	A	A	A	A	P	A	P	A	A	A	A	A	A	A	A	A	A	A	A	A	A	A	A	A	A	A	A	P	A	A	A	478	Nymphalidae	Satyrinae
Erebia triarius	P	P	P	A	A	P	A	P	A	A	A	A	A	P	A	A	A	A	A	P	A	A	A	A	P	A	A	P	A	A	A	P	A	A	A	A	A	A	A	P	A	A	P	A	A	A	479	Nymphalidae	Satyrinae
Erebia polaris	A	A	A	A	A	A	A	A	A	A	A	A	P	A	A	A	A	A	A	A	A	A	A	A	A	A	A	A	A	P	A	A	A	A	A	P	A	A	A	A	A	A	A	A	A	A	480	Nymphalidae	Satyrinae
Erebia medusa	P	A	P	Ex	P	P	P	P	A	P	A	A	A	P	P	P	P	A	A	P	A	P	A	P	P	A	P	P	I	A	P	A	A	A	P	P	P	P	P	A	A	A	P	P	P	A	481	Nymphalidae	Satyrinae
Erebia aethiops	P	A	P	P	P	P	P	P	A	P	A	A	A	P	P	P	P	A	A	P	P	P	P	I	P	A	A	P	I	A	P	A	A	A	P	P	P	P	P	A	A	A	P	A	P	P	482	Nymphalidae	Satyrinae
Erebia pharte	A	A	P	A	A	A	A	A	A	A	A	A	A	P	P	A	A	A	A	P	A	P	A	A	A	A	A	A	A	A	P	A	A	A	P	A	A	P	P	A	A	A	P	A	A	A	483	Nymphalidae	Satyrinae
Erebia christi	A	A	A	A	A	A	A	A	A	A	A	A	A	A	A	A	A	A	A	P	A	A	A	A	A	A	A	A	A	A	A	A	A	A	A	A	A	A	A	A	A	A	P	A	A	A	484	Nymphalidae	Satyrinae
Erebia orientalis	A	A	A	A	A	A	P	A	A	A	A	A	A	A	A	A	A	A	A	A	A	A	A	A	A	A	A	A	A	A	A	A	A	A	A	A	P	A	A	A	A	A	A	A	A	A	485	Nymphalidae	Satyrinae
Erebia epiphron	P	P	P	A	A	P	A	P	A	P	A	A	A	P	P	P	A	A	A	P	A	P	A	A	P	A	A	P	A	A	P	A	A	A	P	A	P	P	P	P	A	A	P	A	A	P	486	Nymphalidae	Satyrinae
Erebia flavofasciata	A	A	P	A	A	A	A	A	A	A	A	A	A	A	A	A	A	A	A	P	A	A	A	A	A	A	A	A	A	A	A	A	A	A	A	A	A	A	A	A	A	A	P	A	A	A	487	Nymphalidae	Satyrinae
Erebia montana	A	A	P	A	A	A	A	A	A	A	A	A	A	P	A	A	A	A	A	P	A	P	A	A	A	A	A	A	A	A	A	A	A	A	A	A	A	A	A	A	A	A	P	A	A	A	488	Nymphalidae	Satyrinae
Erebia styx	A	A	P	A	A	A	A	A	A	A	A	A	A	A	P	A	A	A	A	P	A	A	A	A	A	A	A	A	A	A	A	A	A	A	A	A	A	A	P	A	A	A	P	A	A	A	489	Nymphalidae	Satyrinae
Erebia stiria	A	A	P	A	A	A	A	P	A	A	A	A	A	A	A	A	A	A	A	P	A	A	A	A	A	A	A	A	A	A	A	A	A	A	A	A	A	A	P	A	A	A	A	A	A	A	490	Nymphalidae	Satyrinae
Erebia scipio	A	A	A	A	A	A	A	A	A	A	A	A	A	P	A	A	A	A	A	P	A	A	A	A	A	A	A	A	A	A	A	A	A	A	A	A	A	A	A	A	A	A	A	A	A	A	491	Nymphalidae	Satyrinae
Erebia pronoe	P	A	P	A	A	P	P	P	A	A	A	A	A	P	P	A	A	A	A	P	A	P	A	A	P	A	A	P	A	A	P	A	A	A	P	A	P	P	P	P	A	A	P	A	P	A	492	Nymphalidae	Satyrinae
Erebia melas	P	A	A	A	A	P	P	P	A	A	A	A	A	A	A	P	A	A	A	A	A	A	A	A	P	A	A	P	A	A	A	A	A	A	P	A	P	A	P	A	A	A	A	A	A	A	493	Nymphalidae	Satyrinae
Erebia lefebvrei	A	P	A	A	A	A	A	A	A	A	A	A	A	P	A	A	A	A	A	A	A	A	A	A	A	A	A	A	A	A	A	A	A	A	A	A	A	A	A	P	A	A	A	A	A	A	494	Nymphalidae	Satyrinae
Erebia zapateri	A	A	A	A	A	A	A	A	A	A	A	A	A	A	A	A	A	A	A	A	A	A	A	A	A	A	A	A	A	A	A	A	A	A	A	A	A	A	A	P	A	A	A	A	A	A	495	Nymphalidae	Satyrinae
Erebia neoridas	A	P	A	A	A	A	A	A	A	A	A	A	A	P	A	A	A	A	A	P	A	A	A	A	A	A	A	A	A	A	A	A	A	A	A	A	A	A	A	P	A	A	A	A	A	A	496	Nymphalidae	Satyrinae
[truncated: 14 more columns]

## Sheet: Notes
Notes	Comment
1	Iphiclides feisthamelii is considered a separate species based on differences in adult morphology (Coutsis & van Oorschot 2011, Lafranchis et al. 2015) and nuclear genetic markers (Wiemers & Gottsberger 2010; Dincă et al. 2015), despite of very local hybridization along the contact zone in southern France (Lafranchis et al. 2015) and extensive mitochondrial introgression in the Iberian Peninsula …
2	Author of the name is Giuseppe Gené (1800-1847), not Achille Guenée.
3	Dapporto (2009) has shown that Zerynthia cassandra from peninsular Italy is a separate species based on differences in genital morphology. This was further confirmed by molecular studies (Zinetti et al. 2013).
4	Spialia rosae has been recognised as a separate species endemic to mountains of Spain based on differences in ecology and evidence from molecular studies (mitochondrial DNA, chemical profiles) (Hernández-Roldán et al. 2016, 2018). The species has already been included in Fauna Europaea (2018).
5	Gender agreement changes were applied consistently in accordance with Art. 31.2 and Art. 34.2 (ICZN 1999).
6	As descriptions of both Syrichtus alveus f. foulquieri and Syrichtus alveus f. bellieri were published simultaneously (Oberthür, 1910), the name used by the first reviser (i. e. Rebel 1914), Pyrgus foulquieri, should be used in accordance with Art. 24.2.1 and Art. 24.2.2 (ICZN 1999).
7	Recent studies have shown that Leptidea reali actually comprises two species, L. reali and L. juvernica. L. reali is known from south-western Europe (Spain, S France and Italy) and is replaced by L. juvernica in the rest of the continent (Dincă et al. 2011b). L. sinapis, L. reali and L. juvernica are reproductively isolated due to female mate choice (Dincă et al. 2013).
8	The year of the publication of the name Anteos cleobule is 1831, not 1830 (the original plate [79], published in 1824, carried no names).
9	The name Papilio croceus should be credited to Geoffroy in Fourcroy, 1785, not to Fourcroy (Ganglbauer & Heyden 1906, D'Aguilar and Raimbault 1990, Grieshuber et al. 2012).
10	The date of the publication of the names by Linnaeus in Fauna Svecica (ed. 2) is 14 November 1760, not 1761 (see Evenhuis 1997, Bousquet 2016).
11	The year of the publication of the name Pieris balcana is 1969, not 1970. The publication year of volume 21 (1-4) (1968) of Biološki glasnik [= volume 70 of Periodicum Biologorum] is printed on the cover page as “1969” and, moreover, Lorković´s personal copy held in the Croatian Natural History museum has a hand written addition of the publication year “1969” in the header of his article (Šašić, …
12	According to Lvovsky and Morgun (2007) the species is present in Russia south of the Urals in the Orenburg region. The subspecies Lycaena dimorpha irghiza was originally described as a subspecies of L. japhetica (Nekrutenko 1985), but we follow the decision in the taxonomic review by Lukhtanov (2000).
13	The year of the publication of the name Polyommatus ottomanus is 1831, not 1830. Lefèbvre cited the date 1830, which corresponds to the date of submission of his article, but the issue of the journal was published in January 1831. See Lefèbvre (1831)
14	The generic names Apharitis and Spindasis were synonymised with Cigaritis due to morphological similarities (see Heath & Pringle 2011).
15	The name Papilio roboris was first published in 1793, not 1789 (Lamas 2013).
16	Iolana debilitata has been recognised as a separate species based on constant differences in adult morphology (Dumont 2004) and mitochondrial DNA – barcoding gene (Dincă et al. 2015).
17	The year of the publication of the name and plates for Cupido lorquinii is 1850, not 1847 (Hemming 1937, Heppner 1982).
18	Genus level classiﬁcation in the subfamily Polyommatinae follows Talavera et al. (2013) based on molecular phylogeny. This arrangement partially concurs with differences in genital morphology (see Balletto et al. 2014, Coutsis 2017).
19	The year of the publication of the name Lycaena trochylus is 1844, not 1845 (Tremewan 1988, Olivier 2000).
20	The year of the publication of the name Polyommatus nicias is ante September 1829, not 1830 (Griffin 1931).
21	Polyommatus celina has been recognised as a separate species distributed in the Iberian Peninsula, northern Africa, Sardinia and Sicily based on molecular markers and adult morphology (Wiemers et al. 2010; Dincă et al. 2011a).
22	The author´s surname Sagarra should be without the particle “de”. It is listed as such in the members list of the Institució Catalana d'Història Natural in 1925 bulletin Vol. 5 – Num. 1. Generally, when the particle is written in lowercase, it should be treated as a suffix that goes after the first name (Welter-Schultes 2013).
23	Polyommatus timfristos is considered a separate species due to differences in haploid chromosome number compared to P. aroaniensis and mitochondrial DNA – barcoding gene (Vishnevskaya et al. 2016).
24	Genus level classiﬁcation in the tribe Argynnini follows De Moya et al. (2017) based on molecular phylogenetics. It is corroborated by extensive differences in genital morphology (Simonsen 2006a, 2006b).
25	The name Papilio eunomia was first published in 1800, not 1799 (Poche, 1938).
26	The name Papilio thore was first published in 1804, not 1803 (Hemming 1937).
27	Description of Boloria freija and Boloria frigga must be credited to Thunberg, not to Becklin (Thunberg wrote Becklin's dissertation), see Karsholt & Nielsen (1986).
28	Papilio ichnusa was first described by Hübner (ante 23 December) 1824. Vanessa ichnusa Bonelli was published in February 1825 and is a junior secondary homonym and junior subjective synonym, see Hemming (1937).
29	Among the species with red headed larvae within the Melitaea phoebe species group only M. ornata is present in Europe in southeastern Russia, the Balkan Peninsula, Spain, southeastern France and southern Italy. M. telona is limited to the Levant and M. punica to northern Africa (Toth et al. 2014).
30	Melitaea celadussa Fruhstorfer, 1910 is considered a separate species distributed in western Europe that differs in genital morphology (Higgins 1932) and molecular markers (Leneveu et al. 2009, Dincă et al. 2015) from M. athalia, with hybrids known from the contact zone (Achtelik 2006; Oorschot & Coutsis 2014). The species was referred to also as M. nevadensis Oberthür, 1904, which is a junior pr…
31	Melitaea varia was first described by Herrich-Schäffer (1851) in Systematische Bearbeitung der Schmetterlinge von Europa Vol. 6(48): 2 (Hemming 1937). Melitaea parthenie var. varia Meyer-Dür, 1852 (not 1851) is a junior primary homonym.
32	The name Coenonympha arcánia var. orientális [sic] appeared in part 4 of the ninth edition of Berge's Schmetterlingsbuch, which was published on 22 May 1909 (Lempke 1949), not in 1910.
33	The name Hipparchia fatua was first published in 1843, not 1844 (Olivier 2000).
34	The name Satyrus neomiris was first published in 1823, not 1822. Satyrus neomiris first appeared on page 19 in Godart's Tableau méthodique des lépidoptères..., published in 1823. The vernacular name Godart used in vol. 2 of Hist. nat. Lépid. Pap. France, pp. 88-89, pl. 11, figs. 1-2 (1822), "Satyre néomiris", is unavailable, as it is not a scientific name.
35	The name Satyrus azorinus was first published in 1899, not 1898.
36	The name Satyrus semele pellucida was first published on 15 May 1924, not in 1923.
37	Oeneis ammon is present in Europe in the Polar Urals (Tsvetkov 2006).
38	The name Papilio glacialis was first published in 1785, not 1783.
39	Based on differentiation in mtDNA (barcodes) and differences in morphology, Pseudochazara amalthea and P. tisiphone are considered separate species from allopatric P. anthelea and P. mniszechii respectively (Verovnik & Wiemers 2016).
40	Pseudochazara hippolyte (Esper, 1783) is a junior primary homonym of Papilio hyppolite Drury, 1782. The oldest available name for this taxon is Satyrus mercurius Staudinger, 1887.
41	Papilio afer Esper, 1783 is a junior primary homonym of Papilio afer Drury, 1782 (see Koçak 1981), as is Papilio afra Fabricius, 1787, because it differs only in gender. Therefore the oldest available name is Papilio phegea Borkhausen, 1788.
42	The name Papilio tithonus was first published in 1771 in Mantissa Plantarum Altera, not in 1767.
43	The name Hipparchia rossii was first published in November 1835, not in 1834.
44	The name Erebia dabanensis was published on 13 November 1872, not in 1871.
45	Recently, a population of Erebia was discovered in the Polar Urals and described as a new species, E. churkini Bogdanov, 2008, but is now considered a subspecies of Erebia callias (Tatarinov & Gorbunov 2015). However, no further material is available, therefore it is tentatively considered as part of the European fauna. Erebia callias is a member of the tyndarus group (Albre et al. 2008) and rang…
46	The author of the name Papilio cassioides is Hohenwarth alone as indicated on page III of Reiner & Hohenwarth (1792), not Reiner & Hohenwarth.
47	Based on molecular data and differences in wing patterns Erebia cassioides has been split into three allopatric species (Schmitt et al. 2016). E. cassioides is limited to the eastern Alps, E. arvernensis is distributed in the western Alps, Cantabrian mountains and Pyrénées, while E. neleus is present in the mountains of the Balkan Peninsula and the southern Carpathians.
48	The name Erebia medusa polaris was first published in September 1861, not in 1871.
49	The year of publication of the name Erebia scipio by Boisduval is 1833, not 1832 (Cowan 1970).
